# Supplementary material for: Adherence to guidelines for creatinine and potassium monitoring and discontinuation following renin–angiotensin system blockade: a UK general practice-based cohort study
Source: PubMed Central journal article supplement — BMJ Open. 2017 Jan 9;7(1):e012818. doi: 10.1136/bmjopen-2016-012818 (PMC5223644; doi:10.1136/bmjopen-2016-012818), 2017-01-09
Supplement: bmjopen-2016-012818supp_appendix.pdf [file bmjopen-2016-012818supp_appendix.pdf]

## Appendix: Code list

### Serum creatinine

| Code    | Classification | Description                                       |
|---------|----------------|---------------------------------------------------|
| 4...00  | Read           | laboratory procedures                             |
| 41...00 | Read           | laboratory procedures -general                    |
| 4...11  | Read           | investigation-laboratory                          |
| 4...12  | Read           | test - laboratory                                 |
| 412..00 | Read           | laboratory procedure performed                    |
| 413..00 | Read           | laboratory test requested                         |
| 41B..00 | Read           | laboratory test due                               |
| 41BZ.00 | Read           | laboratory test nos due                           |
| 41G..00 | Read           | laboratory administration procedures              |
| 41G3.00 | Read           | specimen received in laboratory                   |
| 41H..00 | Read           | review of patient laboratory test report          |
| 44J..00 | Read           | blood urea/renal function                         |
| 44J3.00 | Read           | serum creatinine                                  |
| 44J3000 | Read           | serum creatinine abnormal                         |
| 44J3100 | Read           | serum creatinine low                              |
| 44J3200 | Read           | serum creatinine normal                           |
| 44J3300 | Read           | serum creatinine raised                           |
| 44J3z00 | Read           | serum creatinine nos                              |
| 44JC.00 | Read           | corrected plasma creatinine level                 |
| 44JD.00 | Read           | corrected serum creatinine level                  |
| 44JF.00 | Read           | plasma creatinine level                           |
| 44JZ.00 | Read           | blood urea/renal function nos                     |
| 451..00 | Read           | renal function tests                              |
| 4511    | Read           | renal function tests normal                       |
| 4512    | Read           | renal function tests abnormal                     |
| 4515    | Read           | differential renal function                       |
| 4516    | Read           | renal function tests borderline                   |
| 4519    | Read           | deteriorating renal function                      |
| 451H.00 | Read           | recovery of renal function                        |
| 451Z.00 | Read           | renal function test nos                           |
| 4Q40.00 | Read           | creatinine level                                  |
| 4Z...00 | Read           | laboratory procedure nos                          |
| 8A6..00 | Read           | renal function monitoring                         |
| 8H7P.11 | Read           | refer to pathology laboratory                     |
| 8HP..00 | Read           | referral for laboratory tests                     |
| 98F..00 | Read           | reason for repeat laboratory test                 |
| 9b0P.00 | Read           | laboratory request                                |
| 9b0Q.00 | Read           | laboratory result                                 |
| 9mG..00 | Read           | renal function monitoring invitation              |
| 9mG0.00 | Read           | renal function monitoring invitation first letter |
| 9N1Q.00 | Read           | seen in diabetic clinic                           |

|         |      |                                               |
|---------|------|-----------------------------------------------|
| C345.00 | Read | gout due to impairment of renal function      |
| K060.11 | Read | impaired renal function                       |
| K08..00 | Read | impaired renal function disorder              |
| K08y.00 | Read | other impaired renal function disorder        |
| K08y300 | Read | renal function impairment with growth failure |
| K08yz00 | Read | other impaired renal function disorder nos    |
| K08z.00 | Read | impaired renal function disorder nos          |
| R144.00 | Read | [d]renal function test abnormal               |
| R1yz.11 | Read | [d]unexplained laboratory result              |
| ZV72600 | Read | [v]laboratory examination                     |

## Serum potassium

| Code    | Classification | Description                              |
|---------|----------------|------------------------------------------|
| 44I4.00 | Read           | serum potassium                          |
| 4....12 | Read           | test - laboratory                        |
| 4Z...00 | Read           | laboratory procedure nos                 |
| 451..00 | Read           | renal function tests                     |
| C368.00 | Read           | hypokalaemia                             |
| 412..00 | Read           | laboratory procedure performed           |
| 4512.00 | Read           | renal function tests abnormal            |
| 4511.00 | Read           | renal function tests normal              |
| 8A6..00 | Read           | renal function monitoring                |
| C367.00 | Read           | hyperkalaemia                            |
| K060.11 | Read           | impaired renal function                  |
| 4....11 | Read           | investigation-laboratory                 |
| K08..00 | Read           | impaired renal function disorder         |
| R144.00 | Read           | [d]renal function test abnormal          |
| 8HP..00 | Read           | referral for laboratory tests            |
| 4....00 | Read           | laboratory procedures                    |
| 44J..00 | Read           | blood urea/renal function                |
| 44h8.00 | Read           | plasma potassium level                   |
| 44h0.00 | Read           | blood potassium level                    |
| 4I46.00 | Read           | sweat potassium level                    |
| 413..00 | Read           | laboratory test requested                |
| C345.00 | Read           | gout due to impairment of renal function |
| 41...00 | Read           | laboratory procedures -general           |
| 41B..00 | Read           | laboratory test due                      |
| 411..00 | Read           | laboratory test not necessary            |
| 4516.00 | Read           | renal function tests borderline          |
| K08z.00 | Read           | impaired renal function disorder nos     |
| 4519.00 | Read           | deteriorating renal function             |
| 44I4200 | Read           | low serum potassium level                |
| 44I4000 | Read           | normal serum potassium level             |
| 44I4100 | Read           | raised serum potassium level             |
| 44JZ.00 | Read           | blood urea/renal function nos            |

|         |      |                                                   |
|---------|------|---------------------------------------------------|
| 1F34.00 | Read | dietary potassium - low                           |
| 1F3..11 | Read | dietary potassium intake                          |
| 41BZ.00 | Read | laboratory test nos due                           |
| ZC61c00 | Read | potassium supplementation                         |
| ZV72600 | Read | [v]laboratory examination                         |
| 451Z.00 | Read | renal function test nos                           |
| K08y.00 | Read | other impaired renal function disorder            |
| 4Q42.00 | Read | potassium level                                   |
| R1yz.11 | Read | [d]unexplained laboratory result                  |
| ZC28.00 | Read | advice to change potassium intake                 |
| 4I34.11 | Read | potassium in sample                               |
| 9b0Q.00 | Read | laboratory result                                 |
| K08yz00 | Read | other impaired renal function disorder nos        |
| 4515.00 | Read | differential renal function                       |
| 1F36.00 | Read | dietary potassium - high                          |
| 4I34.00 | Read | fluid sample potassium                            |
| 1F35.00 | Read | dietary potassium - average                       |
| 5714.00 | Read | potassium 40 whole body count                     |
| 41G..00 | Read | laboratory administration procedures              |
| 41H..00 | Read | review of patient laboratory test report          |
| 9b0P.00 | Read | laboratory request                                |
| 8B77.00 | Read | potassium supplementation                         |
| 451H.00 | Read | recovery of renal function                        |
| 9mG..00 | Read | renal function monitoring invitation              |
| 98F..00 | Read | reason for repeat laboratory test                 |
| 13BD.00 | Read | low potassium diet                                |
| 9mG0.00 | Read | renal function monitoring invitation first letter |
| 41G3.00 | Read | specimen received in laboratory                   |
| 4IA5.00 | Read | unsatisfactory laboratory analysis                |

## End stage renal disease

| Code    | Classification | Description                                        |
|---------|----------------|----------------------------------------------------|
| 14S2.00 | Read           | h/o: kidney recipient                              |
| 14V2.00 | Read           | h/o: renal dialysis                                |
| 14V2.11 | Read           | h/o: kidney dialysis                               |
| 1Z14.00 | Read           | chronic kidney disease stage 5                     |
| 1Z1K.00 | Read           | chronic kidney disease stage 5 with proteinuria    |
| 1Z1K.11 | Read           | ckd stage 5 with proteinuria                       |
| 1Z1L.00 | Read           | chronic kidney disease stage 5 without proteinuria |
| 1Z1L.11 | Read           | ckd stage 5 without proteinuria                    |
| 4I29.00 | Read           | peritoneal dialysis sample                         |
| 4N0..00 | Read           | dialysis fluid urea level                          |
| 4N2..00 | Read           | dialysis fluid glucose level                       |
| 67P4100 | Read           | discussion about kidney transplantation            |
| 7A60.00 | Read           | arteriovenous shunt                                |

|         |      |                                                             |
|---------|------|-------------------------------------------------------------|
| 7A60000 | Read | insertion of arteriovenous prosthesis                       |
| 7A60100 | Read | creation of arteriovenous fistula nec                       |
| 7A60111 | Read | creation of radial-cephalic fistula                         |
| 7A60112 | Read | creation of brachial-cephalic fistula                       |
| 7A60200 | Read | attention to arteriovenous shunt                            |
| 7A60300 | Read | removal of infected arteriovenous shunt                     |
| 7A60400 | Read | banding of arteriovenous fistula                            |
| 7A60500 | Read | thrombectomy of arteriovenous fistula                       |
| 7A60600 | Read | creation of graft fistula for dialysis                      |
| 7A60y00 | Read | other specified arteriovenous shunt                         |
| 7A60z00 | Read | arteriovenous shunt nos                                     |
| 7A61100 | Read | repair of acquired arteriovenous fistula                    |
| 7A61111 | Read | ligation of acquired arteriovenous fistula                  |
| 7A61400 | Read | ligation of acquired arteriovenous fistula                  |
| 7A61900 | Read | ligation of arteriovenous dialysis fistula                  |
| 7A61A00 | Read | ligation of arteriovenous dialysis graft                    |
| 7B00.00 | Read | transplantation of kidney                                   |
| 7B00100 | Read | transplantation of kidney from live donor                   |
| 7B00111 | Read | allotransplantation of kidney from live donor               |
| 7B00200 | Read | transplantation of kidney from cadaver                      |
| 7B00211 | Read | allotransplantation of kidney from cadaver                  |
| 7B00212 | Read | cadaveric renal transplant                                  |
| 7B00300 | Read | allotransplantation of kidney from cadaver heart-beating    |
| 7B00400 | Read | allotransplantation kidney from cadaver heart non-beating   |
| 7B00600 | Read | xenograft renal transplant                                  |
| 7B00y00 | Read | other specified transplantation of kidney                   |
| 7B00z00 | Read | transplantation of kidney nos                               |
| 7B01500 | Read | transplant nephrectomy                                      |
| 7B01511 | Read | excision of rejected transplanted kidney                    |
| 7B06300 | Read | exploration of renal transplant                             |
| 7B0F.00 | Read | interventions associated with transplantation of kidney     |
| 7B0F100 | Read | pre-transplantation of kidney work-up                       |
| 7B0F300 | Read | post-transplantation of kidney examination                  |
| 7B0Fy00 | Read | os interventions associated with transplantation of kidney  |
| 7B0Fz00 | Read | interventions associated with transplantation of kidney nos |
| 7L1A.00 | Read | compensation for renal failure                              |
| 7L1A000 | Read | renal dialysis                                              |
| 7L1A011 | Read | thomas intravascular shunt for dialysis                     |
| 7L1A100 | Read | peritoneal dialysis                                         |
| 7L1A.11 | Read | dialysis for renal failure                                  |
| 7L1A200 | Read | haemodialysis nec                                           |
| 7L1A300 | Read | haemofiltration                                             |
| 7L1A400 | Read | automated peritoneal dialysis                               |
| 7L1A500 | Read | continuous ambulatory peritoneal dialysis                   |
| 7L1A600 | Read | peritoneal dialysis nec                                     |

|         |      |                                                              |
|---------|------|--------------------------------------------------------------|
| 7L1Ay00 | Read | other specified compensation for renal failure               |
| 7L1Az00 | Read | compensation for renal failure nos                           |
| 7L1B.00 | Read | placement ambulatory apparatus compensation renal failure    |
| 7L1B000 | Read | insertion of ambulatory peritoneal dialysis catheter         |
| 7L1B100 | Read | removal of ambulatory peritoneal dialysis catheter           |
| 7L1B.11 | Read | placement ambulatory dialysis apparatus - compens renal fail |
| 7L1B200 | Read | flushing of peritoneal dialysis catheter                     |
| 7L1By00 | Read | placement ambulatory apparatus- compensate renal failure os  |
| 7L1C.00 | Read | placement other apparatus for compensation for renal failure |
| 7L1C000 | Read | insertion of temporary peritoneal dialysis catheter          |
| 7L1Cy00 | Read | placement other apparatus- compensate for renal failure os   |
| 7L1Cz00 | Read | placement other apparatus- compensate for renal failure nos  |
| 8L50.00 | Read | renal transplant planned                                     |
| 9b8K.00 | Read | transplantation surgery                                      |
| 9Ot5.00 | Read | predicted stage chronic kidney disease                       |
| G72C.00 | Read | ruptured aneurysm of dialysis vascular access                |
| G72D.00 | Read | aneurysm of dialysis arteriovenous fistula                   |
| G72D100 | Read | aneurysm of needle site of dialysis arteriovenous fistula    |
| G72D200 | Read | aneurysm of anastomotic site of dialysis av fistula          |
| G760.00 | Read | acquired arteriovenous fistula                               |
| Gy1..00 | Read | stenosis of dialysis vascular access                         |
| Gy21.00 | Read | thrombosis of dialysis arteriovenous fistula                 |
| Gy3..00 | Read | occlusion of dialysis vascular access                        |
| Gy31.00 | Read | occlusion of dialysis arteriovenous fistula                  |
| Gy40.00 | Read | infection of dialysis arteriovenous graft                    |
| Gy41.00 | Read | infection of dialysis arteriovenous fistula                  |
| Gy51.00 | Read | haemorrhage of dialysis arteriovenous fistula                |
| Gy60.00 | Read | rupture of dialysis arteriovenous graft                      |
| K050.00 | Read | end stage renal failure                                      |
| K05..12 | Read | end stage renal failure                                      |
| K055.00 | Read | chronic kidney disease stage 5                               |
| K0B5.00 | Read | renal tubulo-interstitial disorders in transplant rejectn    |
| K0D..00 | Read | end-stage renal disease                                      |
| Kyu1C00 | Read | [x]renal tubulo-interstitial disorders/transplant rejection  |
| SP01500 | Read | mechanical complication of dialysis catheter                 |
| SP01700 | Read | mechanical complication of arterio-venous surgical fistula   |
| SP05613 | Read | [x] peritoneal dialysis associated peritonitis               |
| SP06B00 | Read | continuous ambulatory peritoneal dialysis associated perit   |
| SP07G00 | Read | stenosis of arteriovenous dialysis fistula                   |
| SP07N00 | Read | arteriovenous fistula thrombosis                             |
| SP08011 | Read | det.ren.func.after ren.transpl                               |
| SP08300 | Read | kidney transplant failure and rejection                      |
| SP08J00 | Read | chronic rejection of renal transplant                        |
| SP08N00 | Read | unexplained episode of renal transplant dysfunction          |
| SP08R00 | Read | renal transplant rejection                                   |

|         |        |                                                              |
|---------|--------|--------------------------------------------------------------|
| SP08T00 | Read   | urological complication of renal transplant                  |
| SP08W00 | Read   | vascular complication of renal transplant                    |
| SP0E.00 | Read   | disorders associated with peritoneal dialysis                |
| SP0G.00 | Read   | anaphylactoid reaction due to haemodialysis                  |
| TA02000 | Read   | accid cut                                                    |
| TA22.00 | Read   | failure of sterile precautions during perfusion              |
| TA22000 | Read   | failure of sterile precautions during kidney dialysis        |
| TB00100 | Read   | kidney transplant with complication                          |
| TB00111 | Read   | renal transplant with complication                           |
| TB11.00 | Read   | kidney dialysis with complication                            |
| TB11.11 | Read   | renal dialysis with complication                             |
| U612200 | Read   | [x]failure sterile precautions dur kidney dialys/other perf  |
| Z1A..00 | Read   | dialysis training                                            |
| Z1A1.00 | Read   | peritoneal dialysis training                                 |
| Z1A2.00 | Read   | haemodialysis training                                       |
| Z919.00 | Read   | care of haemodialysis equipment                              |
| Z919100 | Read   | priming haemodialysis lines                                  |
| Z919300 | Read   | reversing haemodialysis lines                                |
| Z91A.00 | Read   | peritoneal dialysis bag procedure                            |
| ZV42000 | Read   | [v]kidney transplanted                                       |
| ZV45100 | Read   | [v]renal dialysis status                                     |
| ZV56.00 | Read   | [v]aftercare involving intermittent dialysis                 |
| ZV56000 | Read   | [v]aftercare involving extracorporeal dialysis               |
| ZV56011 | Read   | [v]aftercare involving renal dialysis nos                    |
| ZV56100 | Read   | [v]preparatory care for dialysis                             |
| ZV56y00 | Read   | [v]other specified aftercare involving intermittent dialysis |
| ZV56y11 | Read   | [v]aftercare involving peritoneal dialysis                   |
| ZVu3G00 | Read   | [x]other dialysis                                            |
| I77.0   | ICD-10 | arteriovenous fistula                                        |
| N16.5   | ICD-10 | renal tubulo-interstitial disorders in transplant rejection  |
| N18.5   | ICD-10 | chronic kidney disease                                       |
| T82.4   | ICD-10 | mechanical complication of vascular dialysis catheter        |
| T86.1   | ICD-10 | kidney transplant failure and rejection                      |
| Y60.2   | ICD-10 | during kidney dialysis or other perfusion                    |
| Y61.2   | ICD-10 | during kidney dialysis or other perfusion                    |
| Y62.2   | ICD-10 | during kidney dialysis or other perfusion                    |
| Y84.1   | ICD-10 | kidney dialysis                                              |
| Z49     | ICD-10 | care involving dialysis                                      |
| Z49.0   | ICD-10 | preparatory care for dialysis                                |
| Z49.1   | ICD-10 | extracorporeal dialysis                                      |
| Z49.2   | ICD-10 | other dialysis                                               |
| Z94.0   | ICD-10 | kidney transplant status                                     |
| Z99.2   | ICD-10 | dependence on renal dialysis                                 |

## Ischemic heart disease

| <b>Code</b> | <b>Classification</b> | <b>Description</b>                                 |
|-------------|-----------------------|----------------------------------------------------|
| 14A3.00     | Read                  | h/o: myocardial infarct <60                        |
| 14A4.00     | Read                  | h/o: myocardial infarct >60                        |
| 14A5.00     | Read                  | h/o: angina pectoris                               |
| 14AA.00     | Read                  | h/o: heart disease nos                             |
| 14AH.00     | Read                  | h/o: myocardial infarction in last year            |
| 14AJ.00     | Read                  | h/o: angina in last year                           |
| 14AL.00     | Read                  | h/o: treatment for ischaemic heart disease         |
| 14AT.00     | Read                  | history of myocardial infarction                   |
| 14AW.00     | Read                  | h/o acute coronary syndrome                        |
| 182A.00     | Read                  | Chest pain on exertion                             |
| 187..00     | Read                  | frequency of angina                                |
| 1J61.00     | Read                  | suspected ischaemic heart disease                  |
| 3213111     | Read                  | Positive exercise ECG test                         |
| 322..00     | Read                  | ecg: myocardial ischaemia                          |
| 3222        | Read                  | ecg:shows myocardial ischaemia                     |
| 322Z.00     | Read                  | ecg: myocardial ischaemia nos                      |
| 323..00     | Read                  | ecg: myocardial infarction                         |
| 3232        | Read                  | ecg: old myocardial infarction                     |
| 3233        | Read                  | ecg: antero-septal infarct.                        |
| 3234        | Read                  | ecg:posterior/inferior infarct                     |
| 3235        | Read                  | ecg: subendocardial infarct                        |
| 3236        | Read                  | ecg: lateral infarction                            |
| 323Z.00     | Read                  | ecg: myocardial infarct nos                        |
| 32B..00     | Read                  | ecg: q wave                                        |
| 32B2.00     | Read                  | ecg: q wave abnormal                               |
| 32B3.00     | Read                  | ecg: q wave pathological                           |
| 32BZ.00     | Read                  | ecg: q wave nos                                    |
| 32E4.00     | Read                  | ecg: s-t depression                                |
| 44H3.00     | Read                  | cardiac enzymes abnormal                           |
| 44H3000     | Read                  | cardiac enzymes abnormal - first set               |
| 44HJ.00     | Read                  | Plasma creatinine phosphokinase MB isoenzyme level |
| 44MH.00     | Read                  | Plasma troponin T level                            |
| 44p2.00     | Read                  | cardiac troponin positive                          |
| 5533        | Read                  | angiocardiography abnormal                         |
| 5543        | Read                  | coronary arteriograph.abnormal                     |
| 5C11.00     | Read                  | radionuclide heart study abnormal                  |
| 661M000     | Read                  | angina self-management plan agreed                 |
| 662..00     | Read                  | Cardiac disease monitoring                         |
| 662..11     | Read                  | Heart disease monitoring                           |
| 662K.00     | Read                  | angina control                                     |
| 662K000     | Read                  | angina control - good                              |
| 662K100     | Read                  | angina control - poor                              |
| 662K200     | Read                  | angina control - improving                         |
| 662K300     | Read                  | angina control - worsening                         |

|            |      |                                                             |
|------------|------|-------------------------------------------------------------|
| 662Kz00    | Read | angina control nos                                          |
| 662N.00    | Read | CHD monitoring                                              |
| 662Z.00    | Read | Cardiac disease monitoring NOS                              |
| 66f..00    | Read | Cardiovascular disease monitoring                           |
| 66f1.00    | Read | Cardiovascular disease interim monitoring                   |
| 6A2..00    | Read | coronary heart disease annual review                        |
| 6A4..00    | Read | coronary heart disease review                               |
| 7920       | Read | saphenous vein graft replacement of coronary artery         |
| 7920000    | Read | saphenous vein graft replacement of one coronary artery     |
| 7920100    | Read | saphenous vein graft replacement of two coronary arteries   |
| 7920.11.00 | Read | saphenous vein graft bypass of coronary artery              |
| 7920200    | Read | saphenous vein graft replacement of three coronary arteries |
| 7920300    | Read | saphenous vein graft replacement of four+ coronary arteries |
| 7920y00    | Read | saphenous vein graft replacement of coronary artery os      |
| 7920z00    | Read | saphenous vein graft replacement coronary artery nos        |
| 7921       | Read | other autograft replacement of coronary artery              |
| 7921000    | Read | autograft replacement of one coronary artery nec            |
| 792..11    | Read | coronary artery bypass graft operations                     |
| 7921100    | Read | autograft replacement of two coronary arteries nec          |
| 7921.11.00 | Read | other autograft bypass of coronary artery                   |
| 7921200    | Read | autograft replacement of three coronary arteries nec        |
| 7921300    | Read | autograft replacement of four of more coronary arteries nec |
| 7921y00    | Read | other autograft replacement of coronary artery os           |
| 7921z00    | Read | other autograft replacement of coronary artery nos          |
| 7922       | Read | allograft replacement of coronary artery                    |
| 7922000    | Read | allograft replacement of one coronary artery                |
| 7922100    | Read | allograft replacement of two coronary arteries              |
| 7922.11.00 | Read | allograft bypass of coronary artery                         |
| 7922200    | Read | allograft replacement of three coronary arteries            |
| 7922300    | Read | allograft replacement of four or more coronary arteries     |
| 7922y00    | Read | other specified allograft replacement of coronary artery    |
| 7922z00    | Read | allograft replacement of coronary artery nos                |
| 7923       | Read | prosthetic replacement of coronary artery                   |
| 7923000    | Read | prosthetic replacement of one coronary artery               |
| 7923100    | Read | prosthetic replacement of two coronary arteries             |
| 7923.11.00 | Read | prosthetic bypass of coronary artery                        |
| 7923200    | Read | prosthetic replacement of three coronary arteries           |
| 7923300    | Read | prosthetic replacement of four or more coronary arteries    |
| 7923z00    | Read | prosthetic replacement of coronary artery nos               |
| 7924       | Read | revision of bypass for coronary artery                      |
| 7924000    | Read | revision of bypass for one coronary artery                  |
| 7924100    | Read | revision of bypass for two coronary arteries                |
| 7924200    | Read | revision of bypass for three coronary arteries              |
| 7924y00    | Read | other specified revision of bypass for coronary artery      |
| 7924z00    | Read | revision of bypass for coronary artery nos                  |



|            |      |                                                              |
|------------|------|--------------------------------------------------------------|
| 7925       | Read | connection of mammary artery to coronary artery              |
| 7925000    | Read | double anastomosis of mammary arteries to coronary arteries  |
| 7925100    | Read | double implant of mammary arteries into coronary arteries    |
| 7925.11.00 | Read | creation of bypass from mammary artery to coronary artery    |
| 7925300    | Read | single anastomosis of mammary artery to coronary artery nec  |
| 7925311    | Read | lima single anastomosis                                      |
| 7925312    | Read | rima single anastomosis                                      |
| 7925400    | Read | single implantation of mammary artery into coronary artery   |
| 7925y00    | Read | connection of mammary artery to coronary artery os           |
| 7925z00    | Read | connection of mammary artery to coronary artery nos          |
| 7926       | Read | connection of other thoracic artery to coronary artery       |
| 7926000    | Read | double anastom thoracic arteries to coronary arteries nec    |
| 7926200    | Read | single anastomosis of thoracic artery to coronary artery nec |
| 7926300    | Read | single implantation thoracic artery into coronary artery nec |
| 7926z00    | Read | connection of other thoracic artery to coronary artery nos   |
| 7927500    | Read | open angioplasty of coronary artery                          |
| 7928       | Read | transluminal balloon angioplasty of coronary artery          |
| 7928000    | Read | percut transluminal balloon angioplasty one coronary artery  |
| 7928100    | Read | percut translum balloon angioplasty mult coronary arteries   |
| 7928.11.00 | Read | percutaneous balloon coronary angioplasty                    |
| 7928200    | Read | percut translum balloon angioplasty bypass graft coronary a  |
| 7928300    | Read | percut translum cutting balloon angioplasty coronary artery  |
| 7928y00    | Read | transluminal balloon angioplasty of coronary artery os       |
| 7928z00    | Read | transluminal balloon angioplasty of coronary artery nos      |
| 7929000    | Read | percutaneous transluminal laser coronary angioplasty         |
| 7929100    | Read | percut transluminal coronary thrombolysis with streptokinase |
| 7929111    | Read | percut translum coronary thrombolytic therapy- streptokinase |
| 7929300    | Read | rotary blade coronary angioplasty                            |
| 7929400    | Read | insertion of coronary artery stent                           |
| 7929500    | Read | insertion of drug-eluting coronary artery stent              |
| 7929600    | Read | percutaneous transluminal atherectomy of coronary artery     |
| 792B000    | Read | endarterectomy of coronary artery nec                        |
| 792C.00    | Read | other replacement of coronary artery                         |
| 792C000    | Read | replacement of coronary arteries using multiple methods      |
| 792Cy00    | Read | other specified replacement of coronary artery               |
| 792Cz00    | Read | replacement of coronary artery nos                           |
| 792D.00    | Read | other bypass of coronary artery                              |
| 792Dy00    | Read | other specified other bypass of coronary artery              |
| 792Dz00    | Read | other bypass of coronary artery nos                          |
| 793G.00    | Read | perc translumin balloon angioplasty stenting coronary artery |
| 793G000    | Read | perc translum ball angio insert 1-2 drug elut stents cor art |
| 793G100    | Read | perc tran ball angio ins 3 or more drug elut stents cor art  |
| 793G200    | Read | perc translum balloon angioplasty insert 1-2 stents cor art  |
| 793G300    | Read | percutaneous cor balloon angio 3 more stents cor art nec     |
| 793Gy00    | Read | os perc translumina balloon angioplast stenting coronary art |

|         |      |                                                             |
|---------|------|-------------------------------------------------------------|
| 793Gz00 | Read | perc translum balloon angioplasty stenting coronary art nos |
| 7A4B800 | Read | percut translum thrombolysis femoral graft streptokinase    |
| 7A54000 | Read | percutaneous transluminal angioplasty of artery nec         |
| 7A54500 | Read | rotary blade angioplasty                                    |
| 7A54700 | Read | percutaneous transluminal thrombolysis of artery            |
| 7A54800 | Read | percutaneous transluminal atherectomy                       |
| 7A56000 | Read | percutaneous transluminal arterial thrombolysis reconstruct |
| 7A56400 | Read | percutaneous transluminal balloon angioplasty of artery     |
| 7A6G100 | Read | peroperative angioplasty                                    |
| 7A6H300 | Read | prosthetic graft patch angioplasty                          |
| 7A6H400 | Read | percutaneous transluminal angioplasty of vascular graft     |
| 7A6S300 | Read | percutaneous transluminal venous thrombolysis nec           |
| 889A.00 | Read | diab mellit insulin-glucose infus acute myocardial infarct  |
| 8B27.00 | Read | antianginal therapy                                         |
| 8B3k.00 | Read | coronary heart disease medication review                    |
| 8BGC.00 | Read | long term dual antiplatelet drug therapy indicated          |
| 8CMP.00 | Read | coronary heart disease care plan                            |
| 8F9..00 | Read | Cardiac rehabilitation                                      |
| 8F90.00 | Read | Cardiac rehabilitation - phase 1                            |
| 8F91.00 | Read | Cardiac rehabilitation - phase 2                            |
| 8F92.00 | Read | Cardiac rehabilitation - phase 3                            |
| 8F93.00 | Read | Cardiac rehabilitation - phase 4                            |
| 8H2V.00 | Read | admit ischaemic heart disease emergency                     |
| 8H7v.00 | Read | Referral to cardiac rehabilitation nurse                    |
| 8I37.00 | Read | Coronary heart disease monitoring refused                   |
| 8I3a.00 | Read | Cardiac rehabilitation declined                             |
| 8IEY.00 | Read | referral to angina plan self-management programme declined  |
| 8L40.00 | Read | coronary artery bypass graft operation planned              |
| 8L41.00 | Read | coronary angioplasty planned                                |
| 8LF..00 | Read | coronary angiography planned                                |
| 8T04.00 | Read | referral to angina plan self-management programme           |
| 9Ob..00 | Read | Coronary heart disease monitoring administration            |
| 9Ob0.00 | Read | Attends coronary heart disease monitoring                   |
| 9Ob1.00 | Read | Refuses coronary heart disease monitoring                   |
| 9Ob2.00 | Read | Coronary heart disease monitoring default                   |
| 9Ob3.00 | Read | Coronary heart disease monitoring 1st letter                |
| 9Ob4.00 | Read | Coronary heart disease monitoring 2nd letter                |
| 9Ob5.00 | Read | Coronary heart disease monitoring 3rd letter                |
| 9Ob6.00 | Read | Coronary heart disease monitoring verbal invitation         |
| 9Ob8.00 | Read | Coronary heart disease monitoring check done                |
| 9Ob9.00 | Read | Coronary heart disease monitoring telephone invite          |
| G....12 | Read | Cardiac diseases                                            |
| G....13 | Read | Heart diseases                                              |
| G3...00 | Read | ischaemic heart disease                                     |
| G30..00 | Read | acute myocardial infarction                                 |

|         |      |                                                         |
|---------|------|---------------------------------------------------------|
| G300.00 | Read | acute anterolateral infarction                          |
| G301.00 | Read | other specified anterior myocardial infarction          |
| G301000 | Read | acute anteroapical infarction                           |
| G30..11 | Read | attack - heart                                          |
| G301100 | Read | acute anteroseptal infarction                           |
| G30..12 | Read | coronary thrombosis                                     |
| G30..13 | Read | cardiac rupture following myocardial infarction (mi)    |
| G30..14 | Read | heart attack                                            |
| G30..15 | Read | mi - acute myocardial infarction                        |
| G30..16 | Read | thrombosis - coronary                                   |
| G30..17 | Read | silent myocardial infarction                            |
| G301z00 | Read | anterior myocardial infarction nos                      |
| G302.00 | Read | acute inferolateral infarction                          |
| G303.00 | Read | acute inferoposterior infarction                        |
| G304.00 | Read | posterior myocardial infarction nos                     |
| G305.00 | Read | lateral myocardial infarction nos                       |
| G306.00 | Read | true posterior myocardial infarction                    |
| G307.00 | Read | acute subendocardial infarction                         |
| G307000 | Read | acute non-q wave infarction                             |
| G307100 | Read | acute non-st segment elevation myocardial infarction    |
| G308.00 | Read | inferior myocardial infarction nos                      |
| G309.00 | Read | acute q-wave infarct                                    |
| G30A.00 | Read | mural thrombosis                                        |
| G30B.00 | Read | acute posterolateral myocardial infarction              |
| G30X.00 | Read | acute transmural myocardial infarction of unspecif site |
| G30X000 | Read | acute st segment elevation myocardial infarction        |
| G30y.00 | Read | other acute myocardial infarction                       |
| G30y000 | Read | acute atrial infarction                                 |
| G30y100 | Read | acute papillary muscle infarction                       |
| G30y200 | Read | acute septal infarction                                 |
| G30yz00 | Read | other acute myocardial infarction nos                   |
| G30z.00 | Read | acute myocardial infarction nos                         |
| G31..00 | Read | other acute and subacute ischaemic heart disease        |
| G310.00 | Read | postmyocardial infarction syndrome                      |
| G310.11 | Read | dressler's syndrome                                     |
| G3...11 | Read | arteriosclerotic heart disease                          |
| G311.00 | Read | preinfarction syndrome                                  |
| G311000 | Read | myocardial infarction aborted                           |
| G311011 | Read | mi - myocardial infarction aborted                      |
| G311100 | Read | unstable angina                                         |
| G311.11 | Read | crescendo angina                                        |
| G311.12 | Read | impending infarction                                    |
| G311.13 | Read | unstable angina                                         |
| G311.14 | Read | angina at rest                                          |
| G311200 | Read | angina at rest                                          |

|         |      |                                                            |
|---------|------|------------------------------------------------------------|
| G311300 | Read | refractory angina                                          |
| G311400 | Read | worsening angina                                           |
| G311500 | Read | acute coronary syndrome                                    |
| G311z00 | Read | preinfarction syndrome nos                                 |
| G3...12 | Read | atherosclerotic heart disease                              |
| G312.00 | Read | coronary thrombosis not resulting in myocardial infarction |
| G3...13 | Read | ihd - ischaemic heart disease                              |
| G31y.00 | Read | other acute and subacute ischaemic heart disease           |
| G31y000 | Read | acute coronary insufficiency                               |
| G31y100 | Read | microinfarction of heart                                   |
| G31y200 | Read | subendocardial ischaemia                                   |
| G31y300 | Read | transient myocardial ischaemia                             |
| G31yz00 | Read | other acute and subacute ischaemic heart disease nos       |
| G32..00 | Read | old myocardial infarction                                  |
| G32..11 | Read | healed myocardial infarction                               |
| G32..12 | Read | personal history of myocardial infarction                  |
| G33..00 | Read | angina pectoris                                            |
| G330.00 | Read | angina decubitus                                           |
| G330000 | Read | nocturnal angina                                           |
| G330z00 | Read | angina decubitus nos                                       |
| G331.11 | Read | variant angina pectoris                                    |
| G332.00 | Read | coronary artery spasm                                      |
| G33z.00 | Read | angina pectoris nos                                        |
| G33z000 | Read | status anginosus                                           |
| G33z100 | Read | stenocardia                                                |
| G33z200 | Read | syncope anginosa                                           |
| G33z300 | Read | angina on effort                                           |
| G33z400 | Read | ischaemic chest pain                                       |
| G33z500 | Read | post infarct angina                                        |
| G33z600 | Read | new onset angina                                           |
| G33z700 | Read | stable angina                                              |
| G33zz00 | Read | angina pectoris nos                                        |
| G34..00 | Read | other chronic ischaemic heart disease                      |
| G340.00 | Read | coronary atherosclerosis                                   |
| G340000 | Read | single coronary vessel disease                             |
| G340100 | Read | double coronary vessel disease                             |
| G340.11 | Read | triple vessel disease of the heart                         |
| G340.12 | Read | coronary artery disease                                    |
| G341.00 | Read | Aneurysm of heart                                          |
| G341000 | Read | Ventricular cardiac aneurysm                               |
| G341100 | Read | Other cardiac wall aneurysm                                |
| G341.11 | Read | Cardiac aneurysm                                           |
| G341z00 | Read | Aneurysm of heart NOS                                      |
| G342.00 | Read | atherosclerotic cardiovascular disease                     |
| G343.00 | Read | Ischaemic cardiomyopathy                                   |

|         |      |                                                              |
|---------|------|--------------------------------------------------------------|
| G344.00 | Read | silent myocardial ischaemia                                  |
| G34y.00 | Read | other specified chronic ischaemic heart disease              |
| G34y000 | Read | chronic coronary insufficiency                               |
| G34y100 | Read | chronic myocardial ischaemia                                 |
| G34yz00 | Read | other specified chronic ischaemic heart disease nos          |
| G34z.00 | Read | other chronic ischaemic heart disease nos                    |
| G34z000 | Read | asymptomatic coronary heart disease                          |
| G35..00 | Read | subsequent myocardial infarction                             |
| G350.00 | Read | subsequent myocardial infarction of anterior wall            |
| G351.00 | Read | subsequent myocardial infarction of inferior wall            |
| G353.00 | Read | subsequent myocardial infarction of other sites              |
| G35X.00 | Read | subsequent myocardial infarction of unspecified site         |
| G36..00 | Read | certain current complication follow acute myocardial infarct |
| G360.00 | Read | haemopericardium/current comp folow acute myocard infarct    |
| G361.00 | Read | atrial septal defect/curr comp folow acute myocardal infarct |
| G362.00 | Read | ventric septal defect/curr comp fol acute myocardal infarctn |
| G363.00 | Read | ruptur cardiac wall w/out haemopericard/cur comp fol ac mi   |
| G364.00 | Read | ruptur chordae tendinae/curr comp fol acute myocard infarct  |
| G365.00 | Read | rupture papillary muscle/curr comp fol acute myocard infarct |
| G366.00 | Read | thrombosis atrium                                            |
| G38..00 | Read | postoperative myocardial infarction                          |
| G380.00 | Read | postoperative transmural myocardial infarction anterior wall |
| G381.00 | Read | postoperative transmural myocardial infarction inferior wall |
| G383.00 | Read | postoperative transmural myocardial infarction unspec site   |
| G384.00 | Read | postoperative subendocardial myocardial infarction           |
| G38z.00 | Read | postoperative myocardial infarction                          |
| G39..00 | Read | coronary microvascular disease                               |
| G3y..00 | Read | other specified ischaemic heart disease                      |
| G3z..00 | Read | ischaemic heart disease nos                                  |
| G5...00 | Read | other forms of heart disease                                 |
| G501.00 | Read | post infarction pericarditis                                 |
| G574000 | Read | Ventricular fibrillation                                     |
| G5y..00 | Read | other specified heart disease                                |
| G5yyz00 | Read | Other ill-defined heart disease NOS                          |
| G5yz.00 | Read | other heart disease nos                                      |
| G5z..00 | Read | heart disease nos                                            |
| Gyu3.00 | Read | [x]ischaemic heart diseases                                  |
| Gyu3000 | Read | [x]other forms of angina pectoris                            |
| Gyu3200 | Read | [x]other forms of acute ischaemic heart disease              |
| Gyu3300 | Read | [x]other forms of chronic ischaemic heart disease            |
| Gyu3400 | Read | [x]acute transmural myocardial infarction of unspecif site   |
| Gyu3600 | Read | [x]subsequent myocardial infarction of unspecified site      |
| Gyu5.00 | Read | [x]other forms of heart disease                              |
| Gyu7000 | Read | [x]atherosclerosis of other arteries                         |
| SP00300 | Read | mechanical complication of coronary bypass                   |

|         |        |                                                                                                     |
|---------|--------|-----------------------------------------------------------------------------------------------------|
| SP07600 | Read   | coronary artery bypass graft occlusion                                                              |
| Z677.00 | Read   | Cardiac rehabilitation class                                                                        |
| ZL22200 | Read   | Under care of cardiac rehabilitation nurse                                                          |
| ZV45700 | Read   | [v]presence of aortocoronary bypass graft                                                           |
| ZV45800 | Read   | [v]presence of coronary angioplasty implant and graft                                               |
| ZV45K00 | Read   | [v]presence of coronary artery bypass graft                                                         |
| ZV45K11 | Read   | [v]presence of coronary artery bypass graft - cabg                                                  |
| ZV45L00 | Read   | [v]status following coronary angioplasty nos                                                        |
| ZV57900 | Read   | [V]Cardiac rehabilitation                                                                           |
| I20     | ICD-10 | angina pectoris                                                                                     |
| I20.0   | ICD-10 | unstable angina                                                                                     |
| I20.1   | ICD-10 | angina pectoris with documented spasm                                                               |
| I20.8   | ICD-10 | other forms of angina pectoris                                                                      |
| I20.9   | ICD-10 | angina pectoris                                                                                     |
| I21     | ICD-10 | acute myocardial infarction                                                                         |
| I21.0   | ICD-10 | acute transmural myocardial infarction of anterior wall                                             |
| I21.1   | ICD-10 | acute transmural myocardial infarction of inferior wall                                             |
| I21.2   | ICD-10 | acute transmural myocardial infarction of other sites                                               |
| I21.3   | ICD-10 | acute transmural myocardial infarction of unspecified site                                          |
| I21.4   | ICD-10 | acute subendocardial myocardial infarction                                                          |
| I21.9   | ICD-10 | acute myocardial infarction                                                                         |
| I22     | ICD-10 | subsequent myocardial infarction                                                                    |
| I22.0   | ICD-10 | subsequent myocardial infarction of anterior wall                                                   |
| I22.1   | ICD-10 | subsequent myocardial infarction of inferior wall                                                   |
| I22.8   | ICD-10 | subsequent myocardial infarction of other sites                                                     |
| I22.9   | ICD-10 | subsequent myocardial infarction of unspecified site                                                |
| I23     | ICD-10 | certain current complications following acute myocardial infarction                                 |
| I23.0   | ICD-10 | haemopericardium as current complication following acute myocardial infarction                      |
| I23.1   | ICD-10 | atrial septal defect as current complication following acute myocardial infarction                  |
| I23.2   | ICD-10 | ventricular septal defect as current complication following acute myocardial infarction             |
| I23.3   | ICD-10 | rupture of cardiac wall without haemopericardium as current complication following acute myocardial |
| I23.4   | ICD-10 | rupture of chordae tendineae as current complication following acute myocardial infarction          |
| I23.5   | ICD-10 | rupture of papillary muscle as current complication following acute myocardial infarction           |
| I23.6   | ICD-10 | thrombosis of atrium                                                                                |
| I23.8   | ICD-10 | other current complications following acute myocardial infarction                                   |
| I24     | ICD-10 | other acute ischaemic heart diseases                                                                |
| I24.0   | ICD-10 | coronary thrombosis not resulting in myocardial infarction                                          |
| I24.1   | ICD-10 | dressler's syndrome                                                                                 |
| I24.8   | ICD-10 | other forms of acute ischaemic heart disease                                                        |
| I24.9   | ICD-10 | acute ischaemic heart disease                                                                       |
| I25     | ICD-10 | chronic ischaemic heart disease                                                                     |
| I25.0   | ICD-10 | atherosclerotic cardiovascular disease                                                              |
| I25.1   | ICD-10 | atherosclerotic heart disease                                                                       |
| I25.2   | ICD-10 | old myocardial infarction                                                                           |
| I25.5   | ICD-10 | ischaemic cardiomyopathy                                                                            |

|       |        |                                                                    |
|-------|--------|--------------------------------------------------------------------|
| I25.6 | ICD-10 | silent myocardial ischaemia                                        |
| I25.8 | ICD-10 | other forms of chronic ischaemic heart disease                     |
| I25.9 | ICD-10 | chronic ischaemic heart disease                                    |
| T82.2 | ICD-10 | mechanical complication of coronary artery bypass and valve grafts |
| Z95.5 | ICD-10 | presence of coronary angioplasty implant and graft                 |

## Heart failure

| Code    | Classification | Description                                                 |
|---------|----------------|-------------------------------------------------------------|
| 14A6.00 | Read           | h/o: heart failure                                          |
| 14AM.00 | Read           | h/o: heart failure in last year                             |
| 1736    | Read           | paroxysmal nocturnal dyspnoea                               |
| 1J60.00 | Read           | suspected heart failure                                     |
| 1O1..00 | Read           | heart failure confirmed                                     |
| 388D.00 | Read           | new york heart assoc classification heart failure symptoms  |
| 585f.00 | Read           | echocardiogram shows left ventricular systolic dysfunction  |
| 585g.00 | Read           | echocardiogram shows left ventricular diastolic dysfunction |
| 661M500 | Read           | heart failure self-management plan agreed                   |
| 662f.00 | Read           | new york heart association classification - class i         |
| 662g.00 | Read           | new york heart association classification - class ii        |
| 662h.00 | Read           | new york heart association classification - class iii       |
| 662i.00 | Read           | new york heart association classification - class iv        |
| 662p.00 | Read           | heart failure 6 month review                                |
| 662T.00 | Read           | congestive heart failure monitoring                         |
| 662W.00 | Read           | heart failure annual review                                 |
| 679W100 | Read           | education about deteriorating heart failure                 |
| 679X.00 | Read           | heart failure education                                     |
| 67D4.00 | Read           | heart failure information given to patient                  |
| 8B29.00 | Read           | cardiac failure therapy                                     |
| 8CeC.00 | Read           | preferred place of care for next exacerbation heart failure |
| 8CL3.00 | Read           | heart failure care plan discussed with patient              |
| 8CMK.00 | Read           | has heart failure management plan                           |
| 8CMW800 | Read           | heart failure clinical pathway                              |
| 8H2S.00 | Read           | admit heart failure emergency                               |
| 8HBE.00 | Read           | heart failure follow-up                                     |
| 8Hg8.00 | Read           | discharge from practice nurse heart failure clinic          |
| 8HgD.00 | Read           | discharge from heart failure nurse service                  |
| 8HHb.00 | Read           | referral to heart failure nurse                             |
| 8HHz.00 | Read           | referral to heart failure exercise programme                |
| 8Hk0.00 | Read           | referred to heart failure education group                   |
| 8HTL.00 | Read           | referral to heart failure clinic                            |
| 8HTL000 | Read           | referral to rapid access heart failure clinic               |
| 8IE0.00 | Read           | referral to heart failure education group declined          |
| 8IE1.00 | Read           | referral to heart failure exercise programme declined       |
| 9h1..00 | Read           | exception reporting: lvd quality indicators                 |

|         |      |                                                               |
|---------|------|---------------------------------------------------------------|
| 9h11.00 | Read | excepted from lvd quality indicators: patient unsuitable      |
| 9h12.00 | Read | excepted from lvd quality indicators: informed dissent        |
| 9hH..00 | Read | exception reporting: heart failure quality indicators         |
| 9hH0.00 | Read | excepted heart failure quality indicators: patient unsuitable |
| 9hH1.00 | Read | excepted heart failure quality indicators: informed dissent   |
| 9N0k.00 | Read | seen in heart failure clinic                                  |
| 9N2p.00 | Read | seen by community heart failure nurse                         |
| 9N4s.00 | Read | did not attend practice nurse heart failure clinic            |
| 9N4w.00 | Read | did not attend heart failure clinic                           |
| 9N6T.00 | Read | referred by heart failure nurse specialist                    |
| 9On..00 | Read | left ventricular dysfunction monitoring administration        |
| 9On0.00 | Read | left ventricular dysfunction monitoring first letter          |
| 9On1.00 | Read | left ventricular dysfunction monitoring second letter         |
| 9On2.00 | Read | left ventricular dysfunction monitoring third letter          |
| 9On3.00 | Read | left ventricular dysfunction monitoring verbal invite         |
| 9On4.00 | Read | left ventricular dysfunction monitoring telephone invite      |
| 9Or..00 | Read | heart failure monitoring administration                       |
| 9Or0.00 | Read | heart failure review completed                                |
| 9Or1.00 | Read | heart failure monitoring telephone invite                     |
| 9Or2.00 | Read | heart failure monitoring verbal invite                        |
| 9Or3.00 | Read | heart failure monitoring first letter                         |
| 9Or4.00 | Read | heart failure monitoring second letter                        |
| 9Or5.00 | Read | heart failure monitoring third letter                         |
| G1yz100 | Read | rheumatic left ventricular failure                            |
| G210.00 | Read | malignant hypertensive heart disease                          |
| G210100 | Read | malignant hypertensive heart disease with ccf                 |
| G211100 | Read | benign hypertensive heart disease with ccf                    |
| G21z100 | Read | hypertensive heart disease nos with ccf                       |
| G230.00 | Read | malignant hypertensive heart and renal disease                |
| G232.00 | Read | hypertensive heart&renal dis wth (congestive) heart failure   |
| G234.00 | Read | hyperten heart&renal dis+both(congestv)heart and renal fail   |
| G400.00 | Read | acute cor pulmonale                                           |
| G41z.11 | Read | chronic cor pulmonale                                         |
| G554000 | Read | congestive cardiomyopathy                                     |
| G554011 | Read | congestive obstructive cardiomyopathy                         |
| G557100 | Read | beriberi heart disease                                        |
| G58..00 | Read | heart failure                                                 |
| G580.00 | Read | congestive heart failure                                      |
| G580000 | Read | acute congestive heart failure                                |
| G580100 | Read | chronic congestive heart failure                              |
| G580.11 | Read | congestive cardiac failure                                    |
| G580.12 | Read | right heart failure                                           |
| G580.13 | Read | right ventricular failure                                     |
| G580.14 | Read | biventricular failure                                         |
| G580200 | Read | decompensated cardiac failure                                 |



|         |        |                                                                                             |
|---------|--------|---------------------------------------------------------------------------------------------|
| G580300 | Read   | compensated cardiac failure                                                                 |
| G580400 | Read   | congestive heart failure due to valvular disease                                            |
| G581.00 | Read   | left ventricular failure                                                                    |
| G581000 | Read   | acute left ventricular failure                                                              |
| G58..11 | Read   | cardiac failure                                                                             |
| G581.11 | Read   | asthma - cardiac                                                                            |
| G581.13 | Read   | impaired left ventricular function                                                          |
| G582.00 | Read   | acute heart failure                                                                         |
| G583.00 | Read   | heart failure with normal ejection fraction                                                 |
| G583.11 | Read   | hfnf - heart failure with normal ejection fraction                                          |
| G583.12 | Read   | heart failure with preserved ejection fraction                                              |
| G584.00 | Read   | right ventricular failure                                                                   |
| G58z.00 | Read   | heart failure nos                                                                           |
| G58z.11 | Read   | weak heart                                                                                  |
| G58z.12 | Read   | cardiac failure nos                                                                         |
| G5y4z00 | Read   | post cardiac operation heart failure nos                                                    |
| G5yy900 | Read   | left ventricular systolic dysfunction                                                       |
| G5yyA00 | Read   | left ventricular diastolic dysfunction                                                      |
| G5yyB00 | Read   | right ventricular diastolic dysfunction                                                     |
| Q48y100 | Read   | congenital cardiac failure                                                                  |
| R2y1000 | Read   | [d]cardiorespiratory failure                                                                |
| SP11111 | Read   | heart failure as a complication of care                                                     |
| ZRad.00 | Read   | new york heart assoc classification heart failure symptoms                                  |
| I11.0   | ICD-10 | hypertensive heart disease with (congestive) heart failure                                  |
| I13.0   | ICD-10 | hypertensive heart and renal disease with (congestive) heart failure                        |
| I13.2   | ICD-10 | hypertensive heart and renal disease with both (congestive) heart failure and renal failure |
| I26.0   | ICD-10 | pulmonary embolism with mention of acute cor pulmonale                                      |
| I50     | ICD-10 | heart failure                                                                               |
| I50.0   | ICD-10 | congestive heart failure                                                                    |
| I50.1   | ICD-10 | left ventricular failure                                                                    |
| I50.9   | ICD-10 | heart failure                                                                               |

## Hypertensi on

| Code    | Classification | Description                    |
|---------|----------------|--------------------------------|
| 14A2.00 | Read           | h/o: hypertension              |
| 1JD..00 | Read           | suspected hypertension         |
| 2126100 | Read           | hypertension resolved          |
| 212K.00 | Read           | hypertension resolved          |
| 246M.00 | Read           | white coat hypertension        |
| 662..12 | Read           | hypertension monitoring        |
| 6624    | Read           | borderline hyperten:yearly obs |
| 6627    | Read           | good hypertension control      |
| 6628    | Read           | poor hypertension control      |
| 6629    | Read           | hypertension:follow-up default |

|         |      |                                                              |
|---------|------|--------------------------------------------------------------|
| 662b.00 | Read | moderate hypertension control                                |
| 662c.00 | Read | hypertension six month review                                |
| 662d.00 | Read | hypertension annual review                                   |
| 662F.00 | Read | hypertension treatm. started                                 |
| 662G.00 | Read | hypertensive treatm.changed                                  |
| 662H.00 | Read | hypertension treatm.stopped                                  |
| 662O.00 | Read | on treatment for hypertension                                |
| 662P.00 | Read | hypertension monitoring                                      |
| 662P000 | Read | hypertension 9 month review                                  |
| 662q.00 | Read | trial reduction of antihypertensive therapy                  |
| 662r.00 | Read | trial withdrawal of antihypertensive therapy                 |
| 67H8.00 | Read | lifestyle advice regarding hypertension                      |
| 7Q01.00 | Read | high cost hypertension drugs                                 |
| 7Q01y00 | Read | other specified high cost hypertension drugs                 |
| 8B26.00 | Read | antihypertensive therapy                                     |
| 8BL0.00 | Read | patient on maximal tolerated antihypertensive therapy        |
| 8CR4.00 | Read | hypertension clinical management plan                        |
| 8HT5.00 | Read | referral to hypertension clinic                              |
| 8I3N.00 | Read | hypertension treatment refused                               |
| 9h3..00 | Read | exception reporting: hypertension quality indicators         |
| 9h31.00 | Read | excepted from hypertension qual indicators: patient unsuit   |
| 9h32.00 | Read | excepted from hypertension qual indicators: informed dissent |
| 9N03.00 | Read | seen in hypertension clinic                                  |
| 9N1y200 | Read | seen in hypertension clinic                                  |
| 9N4L.00 | Read | dna - did not attend hypertension clinic                     |
| 9OI..00 | Read | hypertension monitoring admin.                               |
| 9OI1.00 | Read | attends hypertension monitor.                                |
| 9OI..11 | Read | hypertension clinic admin.                                   |
| 9OI2.00 | Read | refuses hypertension monitor.                                |
| 9OI3.00 | Read | hyperten.monitor offer default                               |
| 9OI4.00 | Read | hypertens.monitor.1st letter                                 |
| 9OI5.00 | Read | hypertens.monitor 2nd letter                                 |
| 9OI6.00 | Read | hypertens.monitor 3rd letter                                 |
| 9OI7.00 | Read | hypertens.monitor verbal inv.                                |
| 9OI8.00 | Read | hypertens.monitor phone invite                               |
| 9OI9.00 | Read | hypertens.monitor deleted                                    |
| 9OIA.00 | Read | hypertension monitor.chk done                                |
| 9OIA.11 | Read | hypertension monitored                                       |
| 9OIZ.00 | Read | hypertens.monitoring admin.nos                               |
| F404200 | Read | blind hypertensive eye                                       |
| F421300 | Read | hypertensive retinopathy                                     |
| G2...00 | Read | hypertensive disease                                         |
| G20..00 | Read | essential hypertension                                       |
| G200.00 | Read | malignant essential hypertension                             |
| G201.00 | Read | benign essential hypertension                                |

|         |      |                                                             |
|---------|------|-------------------------------------------------------------|
| G20..11 | Read | high blood pressure                                         |
| G20..12 | Read | primary hypertension                                        |
| G202.00 | Read | systolic hypertension                                       |
| G203.00 | Read | diastolic hypertension                                      |
| G20z.00 | Read | essential hypertension nos                                  |
| G20z.11 | Read | hypertension nos                                            |
| G21..00 | Read | hypertensive heart disease                                  |
| G210.00 | Read | malignant hypertensive heart disease                        |
| G210000 | Read | malignant hypertensive heart disease without ccf            |
| G210100 | Read | malignant hypertensive heart disease with ccf               |
| G210z00 | Read | malignant hypertensive heart disease nos                    |
| G2...11 | Read | bp - hypertensive disease                                   |
| G211.00 | Read | benign hypertensive heart disease                           |
| G211000 | Read | benign hypertensive heart disease without ccf               |
| G211100 | Read | benign hypertensive heart disease with ccf                  |
| G211z00 | Read | benign hypertensive heart disease nos                       |
| G21z.00 | Read | hypertensive heart disease nos                              |
| G21z000 | Read | hypertensive heart disease nos without ccf                  |
| G21z011 | Read | cardiomegaly - hypertensive                                 |
| G21z100 | Read | hypertensive heart disease nos with ccf                     |
| G21zz00 | Read | hypertensive heart disease nos                              |
| G22..00 | Read | hypertensive renal disease                                  |
| G220.00 | Read | malignant hypertensive renal disease                        |
| G221.00 | Read | benign hypertensive renal disease                           |
| G22..11 | Read | nephrosclerosis                                             |
| G222.00 | Read | hypertensive renal disease with renal failure               |
| G22z.00 | Read | hypertensive renal disease nos                              |
| G22z.11 | Read | renal hypertension                                          |
| G23..00 | Read | hypertensive heart and renal disease                        |
| G230.00 | Read | malignant hypertensive heart and renal disease              |
| G231.00 | Read | benign hypertensive heart and renal disease                 |
| G232.00 | Read | hypertensive heart&renal dis wth (congestive) heart failure |
| G233.00 | Read | hypertensive heart and renal disease with renal failure     |
| G234.00 | Read | hyperten heart&renal dis+both(congestv)heart and renal fail |
| G23z.00 | Read | hypertensive heart and renal disease nos                    |
| G24..00 | Read | secondary hypertension                                      |
| G240.00 | Read | secondary malignant hypertension                            |
| G240000 | Read | secondary malignant renovascular hypertension               |
| G240z00 | Read | secondary malignant hypertension nos                        |
| G241.00 | Read | secondary benign hypertension                               |
| G241000 | Read | secondary benign renovascular hypertension                  |
| G241z00 | Read | secondary benign hypertension nos                           |
| G244.00 | Read | hypertension secondary to endocrine disorders               |
| G24z.00 | Read | secondary hypertension nos                                  |
| G24z000 | Read | secondary renovascular hypertension nos                     |

|         |        |                                                                                             |
|---------|--------|---------------------------------------------------------------------------------------------|
| G24z100 | Read   | hypertension secondary to drug                                                              |
| G24zz00 | Read   | secondary hypertension nos                                                                  |
| G25..00 | Read   | stage 1 hypertension (nice - nat ins for hth clin excl 2011)                                |
| G25..11 | Read   | stage 1 hypertension                                                                        |
| G26..00 | Read   | severe hypertension (nat inst for health clinical ex 2011)                                  |
| G26..11 | Read   | severe hypertension                                                                         |
| G27..00 | Read   | hypertension resistant to drug therapy                                                      |
| G28..00 | Read   | stage 2 hypertension (nice - nat ins for hth clin excl 2011)                                |
| G2y..00 | Read   | other specified hypertensive disease                                                        |
| G2z..00 | Read   | hypertensive disease nos                                                                    |
| G672.00 | Read   | hypertensive encephalopathy                                                                 |
| G672.11 | Read   | hypertensive crisis                                                                         |
| Gyu2.00 | Read   | [x]hypertensive diseases                                                                    |
| Gyu2000 | Read   | [x]other secondary hypertension                                                             |
| Gyu2100 | Read   | [x]hypertension secondary to other renal disorders                                          |
| L122.00 | Read   | other pre-existing hypertension in preg/childbirth/puerp                                    |
| L122000 | Read   | other pre-existing hypertension in preg/childb/puerp unspec                                 |
| L122100 | Read   | other pre-existing hypertension in preg/childb/puerp - deliv                                |
| L122300 | Read   | other pre-exist hypertension in preg/childb/puerp-not deliv                                 |
| L122z00 | Read   | other pre-existing hypertension in preg/childb/puerp nos                                    |
| L127.00 | Read   | pre-eclampsia or eclampsia with pre-existing hypertension                                   |
| L127z00 | Read   | pre-eclampsia or eclampsia + pre-existing hypertension nos                                  |
| L128.00 | Read   | pre-exist hypertension compl preg childbirth and puerperium                                 |
| L128000 | Read   | pre-exist hyperten heart dis compl preg childbth+puerperium                                 |
| L128200 | Read   | pre-exist 2ndry hypertens comp preg childbth and puerperium                                 |
| TJC7.00 | Read   | adverse reaction to other antihypertensives                                                 |
| TJC7z00 | Read   | adverse reaction to antihypertensives nos                                                   |
| U60C500 | Read   | [x]oth antihyperten drug caus advers eff in therap use                                      |
| U60C511 | Read   | [x] adverse reaction to other antihypertensives                                             |
| U60C51A | Read   | [x] adverse reaction to antihypertensives nos                                               |
| I10     | ICD-10 | essential (primary) hypertension                                                            |
| I11     | ICD-10 | hypertensive heart disease                                                                  |
| I11.0   | ICD-10 | hypertensive heart disease with (congestive) heart failure                                  |
| I11.9   | ICD-10 | hypertensive heart disease without (congestive) heart failure                               |
| I12     | ICD-10 | hypertensive renal disease                                                                  |
| I12.0   | ICD-10 | hypertensive renal disease with renal failure                                               |
| I12.9   | ICD-10 | hypertensive renal disease without renal failure                                            |
| I13     | ICD-10 | hypertensive heart and renal disease                                                        |
| I13.0   | ICD-10 | hypertensive heart and renal disease with (congestive) heart failure                        |
| I13.1   | ICD-10 | hypertensive heart and renal disease with renal failure                                     |
| I13.2   | ICD-10 | hypertensive heart and renal disease with both (congestive) heart failure and renal failure |
| I13.9   | ICD-10 | hypertensive heart and renal disease                                                        |
| I15     | ICD-10 | secondary hypertension                                                                      |
| I15.0   | ICD-10 | renovascular hypertension                                                                   |
| I15.1   | ICD-10 | hypertension secondary to other renal disorders                                             |

|       |        |                                               |
|-------|--------|-----------------------------------------------|
| I15.2 | ICD-10 | hypertension secondary to endocrine disorders |
| I15.8 | ICD-10 | other secondary hypertension                  |
| I15.9 | ICD-10 | secondary hypertension                        |
| I67.4 | ICD-10 | hypertensive encephalopathy                   |

## Arrhythmia

| Code    | Classification | Description                                                  |
|---------|----------------|--------------------------------------------------------------|
| 14AN.00 | Read           | h/o: atrial fibrillation                                     |
| 14AR.00 | Read           | history of atrial flutter                                    |
| 212R.00 | Read           | atrial fibrillation resolved                                 |
| 327..00 | Read           | ecg: supraventricular arrhythmia                             |
| 3272    | Read           | ecg: atrial fibrillation                                     |
| 3273    | Read           | ecg: atrial flutter                                          |
| 328..00 | Read           | ecg: ventricular arrhythmia                                  |
| 3282    | Read           | ecg: ventricular tachycardia                                 |
| 328Z.00 | Read           | ecg: ventricular arrhythmia nos                              |
| 662S.00 | Read           | atrial fibrillation monitoring                               |
| 6A9..00 | Read           | atrial fibrillation annual review                            |
| 7936A00 | Read           | implant intravenous pacemaker for atrial fibrillation        |
| 8CMW200 | Read           | atrial fibrillation care pathway                             |
| 8HTy.00 | Read           | referral to atrial fibrillation clinic                       |
| 9hF..00 | Read           | exception reporting: atrial fibrillation quality indicators  |
| 9hF1.00 | Read           | excepted from atrial fibrillation qual indic: inform dissent |
| 9Os..00 | Read           | atrial fibrillation monitoring administration                |
| 9Os0.00 | Read           | atrial fibrillation monitoring first letter                  |
| 9Os1.00 | Read           | atrial fibrillation monitoring second letter                 |
| 9Os2.00 | Read           | atrial fibrillation monitoring third letter                  |
| 9Os3.00 | Read           | atrial fibrillation monitoring verbal invite                 |
| 9Os4.00 | Read           | atrial fibrillation monitoring telephone invite              |
| G559.00 | Read           | arrhythmogenic right ventricular cardiomyopathy              |
| G55A.11 | Read           | tachycardia-induced cardiomyopathy                           |
| G56..00 | Read           | conduction disorders                                         |
| G56..11 | Read           | conduction disorders of heart                                |
| G567400 | Read           | wolff-parkinson-white syndrome                               |
| G56y.00 | Read           | other conduction disorders                                   |
| G56y000 | Read           | lown-ganong-levine syndrome                                  |
| G56zz00 | Read           | conduction disorders nos                                     |
| G57..00 | Read           | cardiac dysrhythmias                                         |
| G570.00 | Read           | paroxysmal supraventricular tachycardia                      |
| G570000 | Read           | paroxysmal atrial tachycardia                                |
| G570100 | Read           | paroxysmal atrioventricular tachycardia                      |
| G570200 | Read           | paroxysmal junctional tachycardia                            |
| G570300 | Read           | paroxysmal nodal tachycardia                                 |
| G570z00 | Read           | paroxysmal supraventricular tachycardia nos                  |
| G571.00 | Read           | paroxysmal ventricular tachycardia                           |

|         |        |                                                |
|---------|--------|------------------------------------------------|
| G57..11 | Read   | cardiac arrhythmias                            |
| G571.11 | Read   | ventricular tachycardia                        |
| G572.00 | Read   | paroxysmal tachycardia unspecified             |
| G572000 | Read   | essential paroxysmal tachycardia               |
| G572z00 | Read   | paroxysmal tachycardia nos                     |
| G573.00 | Read   | atrial fibrillation and flutter                |
| G573000 | Read   | atrial fibrillation                            |
| G573100 | Read   | atrial flutter                                 |
| G573200 | Read   | paroxysmal atrial fibrillation                 |
| G573300 | Read   | non-rheumatic atrial fibrillation              |
| G573400 | Read   | permanent atrial fibrillation                  |
| G573500 | Read   | persistent atrial fibrillation                 |
| G573600 | Read   | paroxysmal atrial flutter                      |
| G573z00 | Read   | atrial fibrillation and flutter nos            |
| G574.00 | Read   | ventricular fibrillation and flutter           |
| G574100 | Read   | ventricular flutter                            |
| G574z00 | Read   | ventricular fibrillation and flutter nos       |
| G576300 | Read   | atrial premature depolarization                |
| G576400 | Read   | junctional premature depolarization            |
| G576500 | Read   | ventricular premature depolarization           |
| G57y.00 | Read   | other cardiac dysrhythmias                     |
| G57y600 | Read   | nodal rhythm disorder                          |
| G57y900 | Read   | supraventricular tachycardia nos               |
| G57yA00 | Read   | re-entry ventricular arrhythmia                |
| G57yz00 | Read   | other cardiac dysrhythmia nos                  |
| G57z.00 | Read   | cardiac dysrhythmia nos                        |
| Gyu5a00 | Read   | [x]other specified cardiac arrhythmias         |
| I45.6   | ICD-10 | pre-excitation syndrome                        |
| I47     | ICD-10 | paroxysmal tachycardia                         |
| I47.0   | ICD-10 | re-entry ventricular arrhythmia                |
| I47.1   | ICD-10 | supraventricular tachycardia                   |
| I47.2   | ICD-10 | ventricular tachycardia                        |
| I47.9   | ICD-10 | paroxysmal tachycardia                         |
| I48     | ICD-10 | atrial fibrillation and flutter                |
| I49     | ICD-10 | other cardiac arrhythmias                      |
| I49.0   | ICD-10 | ventricular fibrillation and flutter           |
| I49.1   | ICD-10 | atrial premature depolarization                |
| I49.2   | ICD-10 | junctional premature depolarization            |
| I49.3   | ICD-10 | ventricular premature depolarization           |
| I49.4   | ICD-10 | other and unspecified premature depolarization |
| I49.5   | ICD-10 | sick sinus syndrome                            |
| R00.0   | ICD-10 | tachycardia                                    |

## Peripheral arterial disease

**Code            Classification    Description**

|         |        |                                                             |
|---------|--------|-------------------------------------------------------------|
| G73z000 | Read   | intermittent claudication                                   |
| G73z011 | Read   | claudication                                                |
| G73..12 | Read   | ischaemia of legs                                           |
| G73zz00 | Read   | peripheral vascular disease nos                             |
| G73z.00 | Read   | peripheral vascular disease nos                             |
| G73yz00 | Read   | other specified peripheral vascular disease nos             |
| G73..11 | Read   | peripheral ischaemic vascular disease                       |
| G73..00 | Read   | other peripheral vascular disease                           |
| G73..13 | Read   | peripheral ischaemia                                        |
| 2G63.00 | Read   | ischaemic toe                                               |
| G702.00 | Read   | Extremity artery atheroma                                   |
| G742z00 | Read   | peripheral arterial embolism and thrombosis nos             |
| G702z00 | Read   | Extremity artery atheroma NOS                               |
| G76A.00 | Read   | arterial insufficiency                                      |
| G73y100 | Read   | Peripheral angiopathic disease EC NOS                       |
| R055011 | Read   | [d]peripheral circulatory failure                           |
| G73y.00 | Read   | other specified peripheral vascular disease                 |
| 14NB.00 | Read   | h/o: peripheral vascular disease procedure                  |
| Gyu7400 | Read   | [x]other specified peripheral vascular diseases             |
| 7A56600 | Read   | percutaneous transluminal placement peripheral stent artery |
| G733.00 | Read   | ischaemic foot                                              |
| G73z012 | Read   | vascular claudication                                       |
| G734.00 | Read   | peripheral arterial disease                                 |
| 16I..00 | Read   | claudication distance                                       |
| I70.2   | ICD-10 | atherosclerosis of arteries of extremities                  |
| I70.20  | ICD-10 | atherosclerosis of arteries of extremities                  |
| I70.21  | ICD-10 | atherosclerosis of arteries of extremities                  |
| I73     | ICD-10 | other peripheral vascular diseases                          |
| I73.8   | ICD-10 | other specified peripheral vascular diseases                |
| I73.9   | ICD-10 | peripheral vascular disease, unspecified                    |
| I79.2   | ICD-10 | peripheral angiopathy in diseases classified elsewhere      |

## **Myocardial infarction**

| <b>Code</b> | <b>Classification</b> | <b>Description</b>                      |
|-------------|-----------------------|-----------------------------------------|
| 14A3.00     | Read                  | H/O: myocardial infarct <60             |
| 14A4.00     | Read                  | H/O: myocardial infarct >60             |
| 14AH.00     | Read                  | H/O: Myocardial infarction in last year |
| 323..00     | Read                  | ECG: myocardial infarction              |
| 3232.00.00  | Read                  | ECG: old myocardial infarction          |
| 3233.00.00  | Read                  | ECG: antero-septal infarct.             |
| 3234.00.00  | Read                  | ECG:posterior/inferior infarct          |
| 3235.00.00  | Read                  | ECG: subendocardial infarct             |
| 3236.00.00  | Read                  | ECG: lateral infarction                 |
| 323Z.00     | Read                  | ECG: myocardial infarct NOS             |
| 32B2.00     | Read                  | ECG: Q wave abnormal                    |

|         |      |                                                              |
|---------|------|--------------------------------------------------------------|
| 32B3.00 | Read | ECG: Q wave pathological                                     |
| 32E3.00 | Read | ECG: S-T elevation                                           |
| 44H3.00 | Read | Cardiac enzymes abnormal                                     |
| 44H3000 | Read | Cardiac enzymes abnormal - first set                         |
| 44p2.00 | Read | Cardiac troponin positive                                    |
| 7929100 | Read | Percut transluminal coronary thrombolysis with streptokinase |
| 7929111 | Read | Percut translum coronary thrombolytic therapy- streptokinase |
| 889A.00 | Read | Diab mellit insulin-glucose infus acute myocardial infarct   |
| 8B3a.00 | Read | Door to needle time                                          |
| 8B3g.00 | Read | Pain to thrombolysis time                                    |
| G30..00 | Read | Acute myocardial infarction                                  |
| G30..11 | Read | Attack - heart                                               |
| G30..12 | Read | Coronary thrombosis                                          |
| G30..13 | Read | Cardiac rupture following myocardial infarction (MI)         |
| G30..14 | Read | Heart attack                                                 |
| G30..15 | Read | MI - acute myocardial infarction                             |
| G30..16 | Read | Thrombosis - coronary                                        |
| G30..17 | Read | Silent myocardial infarction                                 |
| G300.00 | Read | Acute anterolateral infarction                               |
| G301.00 | Read | Other specified anterior myocardial infarction               |
| G301000 | Read | Acute anteroapical infarction                                |
| G301100 | Read | Acute anteroseptal infarction                                |
| G301z00 | Read | Anterior myocardial infarction NOS                           |
| G302.00 | Read | Acute inferolateral infarction                               |
| G303.00 | Read | Acute inferoposterior infarction                             |
| G304.00 | Read | Posterior myocardial infarction NOS                          |
| G305.00 | Read | Lateral myocardial infarction NOS                            |
| G306.00 | Read | True posterior myocardial infarction                         |
| G307.00 | Read | Acute subendocardial infarction                              |
| G307000 | Read | Acute non-Q wave infarction                                  |
| G307100 | Read | Acute non-ST segment elevation myocardial infarction         |
| G308.00 | Read | Inferior myocardial infarction NOS                           |
| G309.00 | Read | Acute Q-wave infarct                                         |
| G30A.00 | Read | Mural thrombosis                                             |
| G30B.00 | Read | Acute posterolateral myocardial infarction                   |
| G30X.00 | Read | Acute transmural myocardial infarction of unspecif site      |
| G30X000 | Read | Acute ST segment elevation myocardial infarction             |
| G30y.00 | Read | Other acute myocardial infarction                            |
| G30y000 | Read | Acute atrial infarction                                      |
| G30y100 | Read | Acute papillary muscle infarction                            |
| G30y200 | Read | Acute septal infarction                                      |
| G30yz00 | Read | Other acute myocardial infarction NOS                        |
| G30z.00 | Read | Acute myocardial infarction NOS                              |
| G310.00 | Read | Postmyocardial infarction syndrome                           |
| G310.11 | Read | Dressler's syndrome                                          |



|         |        |                                                                     |
|---------|--------|---------------------------------------------------------------------|
| G31y100 | Read   | Microinfarction of heart                                            |
| G32..00 | Read   | Old myocardial infarction                                           |
| G32..11 | Read   | Healed myocardial infarction                                        |
| G32..12 | Read   | Personal history of myocardial infarction                           |
| G33z500 | Read   | Post infarct angina                                                 |
| G35..00 | Read   | Subsequent myocardial infarction                                    |
| G350.00 | Read   | Subsequent myocardial infarction of anterior wall                   |
| G351.00 | Read   | Subsequent myocardial infarction of inferior wall                   |
| G353.00 | Read   | Subsequent myocardial infarction of other sites                     |
| G35X.00 | Read   | Subsequent myocardial infarction of unspecified site                |
| G36..00 | Read   | Certain current complication follow acute myocardial infarct        |
| G360.00 | Read   | Haemopericardium/current comp folow acut myocard infarct            |
| G361.00 | Read   | Atrial septal defect/curr comp folow acut myocardal infarct         |
| G362.00 | Read   | Ventric septal defect/curr comp fol acut myocardal infarctn         |
| G363.00 | Read   | Ruptur cardiac wall w'out haemopericard/cur comp fol ac MI          |
| G364.00 | Read   | Ruptur chordae tendinae/curr comp fol acute myocard infarct         |
| G365.00 | Read   | Rupture papillary muscle/curr comp fol acute myocard infarct        |
| G366.00 | Read   | Thrombosis atrium,auric append&vent/curr comp foll acute MI         |
| G38..00 | Read   | Postoperative myocardial infarction                                 |
| G380.00 | Read   | Postoperative transmural myocardial infarction anterior wall        |
| G381.00 | Read   | Postoperative transmural myocardial infarction inferior wall        |
| G384.00 | Read   | Postoperative subendocardial myocardial infarction                  |
| G38z.00 | Read   | Postoperative myocardial infarction, unspecified                    |
| G501.00 | Read   | Post infarction pericarditis                                        |
| Gyu3400 | Read   | [X]Acute transmural myocardial infarction of unspecif site          |
| I21     | ICD-10 | Acute myocardial infarction                                         |
| I22     | ICD-10 | Subsequent myocardial infarction                                    |
| I23     | ICD-10 | Certain current complications following acute myocardial infarction |

## Diabetes mellitus

| Code    | Classification | Description                                                |
|---------|----------------|------------------------------------------------------------|
| 13AB.00 | Read           | diabetic lipid lowering diet                               |
| 13AC.00 | Read           | diabetic weight reducing diet                              |
| 13B1.00 | Read           | diabetic diet                                              |
| 13L4.11 | Read           | diabetic child                                             |
| 1434    | Read           | h/o: diabetes mellitus                                     |
| 14F4.00 | Read           | h/o: admission in last year for diabetes foot problem      |
| 14P3.00 | Read           | h/o: insulin therapy                                       |
| 2BBF.00 | Read           | retinal abnormality - diabetes related                     |
| 2BBJ.00 | Read           | o/e - no right diabetic retinopathy                        |
| 2BBk.00 | Read           | o/e - right eye stable treated prolif diabetic retinopathy |
| 2BBK.00 | Read           | o/e - no left diabetic retinopathy                         |
| 2BBI.00 | Read           | o/e - left eye stable treated prolif diabetic retinopathy  |
| 2BBL.00 | Read           | o/e - diabetic maculopathy present both eyes               |
| 2BBM.00 | Read           | o/e - diabetic maculopathy absent both eyes                |

|         |      |                                                       |
|---------|------|-------------------------------------------------------|
| 2BBo.00 | Read | o/e - sight threatening diabetic retinopathy          |
| 2BBP.00 | Read | o/e - right eye background diabetic retinopathy       |
| 2BBQ.00 | Read | o/e - left eye background diabetic retinopathy        |
| 2BBr.00 | Read | impaired vision due to diabetic retinopathy           |
| 2BBR.00 | Read | o/e - right eye preproliferative diabetic retinopathy |
| 2BBS.00 | Read | o/e - left eye preproliferative diabetic retinopathy  |
| 2BBT.00 | Read | o/e - right eye proliferative diabetic retinopathy    |
| 2BBV.00 | Read | o/e - left eye proliferative diabetic retinopathy     |
| 2BBW.00 | Read | o/e - right eye diabetic maculopathy                  |
| 2BBX.00 | Read | o/e - left eye diabetic maculopathy                   |
| 2G51000 | Read | foot abnormality - diabetes related                   |
| 2G5A.00 | Read | o/e - right diabetic foot at risk                     |
| 2G5B.00 | Read | o/e - left diabetic foot at risk                      |
| 2G5C.00 | Read | foot abnormality - diabetes related                   |
| 2G5d.00 | Read | o/e - left diabetic foot at increased risk            |
| 2G5e.00 | Read | o/e - right diabetic foot at increased risk           |
| 2G5E.00 | Read | o/e - right diabetic foot at low risk                 |
| 2G5F.00 | Read | o/e - right diabetic foot at moderate risk            |
| 2G5G.00 | Read | o/e - right diabetic foot at high risk                |
| 2G5H.00 | Read | o/e - right diabetic foot - ulcerated                 |
| 2G5I.00 | Read | o/e - left diabetic foot at low risk                  |
| 2G5J.00 | Read | o/e - left diabetic foot at moderate risk             |
| 2G5K.00 | Read | o/e - left diabetic foot at high risk                 |
| 2G5L.00 | Read | o/e - left diabetic foot - ulcerated                  |
| 2G5V.00 | Read | o/e - right chronic diabetic foot ulcer               |
| 2G5W.00 | Read | o/e - left chronic diabetic foot ulcer                |
| 3881    | Read | education score - diabetes                            |
| 3882    | Read | diabetes well being questionnaire                     |
| 3883    | Read | diabetes treatment satisfaction questionnaire         |
| 42c..00 | Read | hba1 - diabetic control                               |
| 42c0.00 | Read | hba1 < 7% - good control                              |
| 42c1.00 | Read | hba1 7 - 10% - borderline control                     |
| 42c2.00 | Read | hba1 > 10% - bad control                              |
| 42W..00 | Read | hb. a1c - diabetic control                            |
| 42W1.00 | Read | hb. a1c < 7% - good control                           |
| 42W2.00 | Read | hb. a1c 7-10% - borderline                            |
| 42W3.00 | Read | hb. a1c > 10% - bad control                           |
| 42WZ.00 | Read | hb. a1c - diabetic control nos                        |
| 44T9.00 | Read | glucometer blood sugar                                |
| 44UZ.00 | Read | blood glucose 14+ mmol/l                              |
| 44Uz.11 | Read | blood hyperglycaemia nos                              |
| 44V3.00 | Read | glucose tol. test diabetic                            |
| 661N400 | Read | diabetes self-management plan review                  |
| 66A..00 | Read | diabetic monitoring                                   |
| 66A1.00 | Read | initial diabetic assessment                           |

|         |      |                                                     |
|---------|------|-----------------------------------------------------|
| 66A2.00 | Read | follow-up diabetic assessment                       |
| 66A3.00 | Read | diabetic on diet only                               |
| 66A4.00 | Read | diabetic on oral treatment                          |
| 66A5.00 | Read | diabetic on insulin                                 |
| 66A8.00 | Read | has seen dietician - diabetes                       |
| 66A9.00 | Read | understands diet - diabetes                         |
| 66Aa.00 | Read | diabetic diet - poor compliance                     |
| 66AA.11 | Read | injection sites - diabetic                          |
| 66Ab.00 | Read | diabetic foot examination                           |
| 66Ac.00 | Read | diabetic peripheral neuropathy screening            |
| 66AC.00 | Read | blood sugar charts                                  |
| 66AD.00 | Read | fundoscopy - diabetic check                         |
| 66Ae.00 | Read | hba1c target                                        |
| 66AE.00 | Read | feet examination                                    |
| 66Af.00 | Read | patient diabetes education review                   |
| 66Ag.00 | Read | insulin needles changed daily                       |
| 66AG.00 | Read | diabetic drug side effects                          |
| 66Ah.00 | Read | insulin needles changed for each injection          |
| 66AH.00 | Read | diabetic treatment changed                          |
| 66AH000 | Read | conversion to insulin                               |
| 66AH100 | Read | conversion to insulin in secondary care             |
| 66AH200 | Read | conversion to insulin by diabetes specialist nurse  |
| 66Ai.00 | Read | diabetic 6 month review                             |
| 66AI.00 | Read | diabetic - good control                             |
| 66Aj.00 | Read | insulin needles changed less than once a day        |
| 66AJ.00 | Read | diabetic - poor control                             |
| 66AJ000 | Read | chronic hyperglycaemia                              |
| 66AJ100 | Read | brittle diabetes                                    |
| 66AJ.11 | Read | unstable diabetes                                   |
| 66AJ200 | Read | loss of hypoglycaemic warning                       |
| 66AJz00 | Read | diabetic - poor control nos                         |
| 66Ak.00 | Read | diabetic monitoring - lower risk albumin excretion  |
| 66AK.00 | Read | diabetic - cooperative patient                      |
| 66Al.00 | Read | diabetic monitoring - higher risk albumin excretion |
| 66AL.00 | Read | diabetic-uncooperative patient                      |
| 66Am.00 | Read | insulin dose changed                                |
| 66AM.00 | Read | diabetic - follow-up default                        |
| 66An.00 | Read | diabetes type 1 review                              |
| 66AN.00 | Read | date diabetic treatment start                       |
| 66Ao.00 | Read | diabetes type 2 review                              |
| 66Ap.00 | Read | insulin treatment initiated                         |
| 66AP.00 | Read | diabetes: practice programme                        |
| 66Aq.00 | Read | diabetic foot screen                                |
| 66AQ.00 | Read | diabetes: shared care programme                     |
| 66AQ000 | Read | unsuitable for diabetes year of care programme      |

|         |      |                                                            |
|---------|------|------------------------------------------------------------|
| 66AQ100 | Read | declined consent for diabetes year of care programme       |
| 66AR.00 | Read | diabetes management plan given                             |
| 66As.00 | Read | diabetic on subcutaneous treatment                         |
| 66AS.00 | Read | diabetic annual review                                     |
| 66AS000 | Read | diabetes year of care annual review                        |
| 66At.00 | Read | diabetic dietary review                                    |
| 66AT.00 | Read | annual diabetic blood test                                 |
| 66At000 | Read | type i diabetic dietary review                             |
| 66At011 | Read | type 1 diabetic dietary review                             |
| 66At100 | Read | type ii diabetic dietary review                            |
| 66At111 | Read | type 2 diabetic dietary review                             |
| 66Au.00 | Read | diabetic erectile dysfunction review                       |
| 66AU.00 | Read | diabetes care by hospital only                             |
| 66Av.00 | Read | diabetic assessment of erectile dysfunction                |
| 66AV.00 | Read | diabetic on insulin and oral treatment                     |
| 66Aw.00 | Read | insulin dose                                               |
| 66AW.00 | Read | diabetic foot risk assessment                              |
| 66AY.00 | Read | diabetic diet - good compliance                            |
| 66AZ.00 | Read | diabetic monitoring nos                                    |
| 66b1.00 | Read | diabetic monitoring not required                           |
| 66o..00 | Read | further diabetic monitoring                                |
| 6761    | Read | diabetic pre-pregnancy counselling                         |
| 679c.00 | Read | insulin administration education                           |
| 679L.00 | Read | health education - diabetes                                |
| 679L000 | Read | education in self management of diabetes                   |
| 679L200 | Read | education about diabetes and driving                       |
| 679L211 | Read | advice about diabetes and driving                          |
| 679R.00 | Read | patient offered diabetes structured education programme    |
| 67D8.00 | Read | provision of diabetes clinical summary                     |
| 68A7.00 | Read | diabetic retinopathy screening                             |
| 68A9.00 | Read | diabetic retinopathy screening offered                     |
| 68AB.00 | Read | diabetic digital retinopathy screening offered             |
| 7276    | Read | pan retinal photocoagulation for diabetes                  |
| 7L10000 | Read | continuous subcutaneous infusion of insulin                |
| 7L10011 | Read | subcutaneous infusion with insulin pump                    |
| 7L19800 | Read | subcutaneous injection of insulin                          |
| 7L19J00 | Read | subcutaneous injection of exenatide                        |
| 889A.00 | Read | diab mellit insulin-glucose infus acute myocardial infarct |
| 8A12.00 | Read | diabetic crisis monitoring                                 |
| 8A13.00 | Read | diabetic stabilisation                                     |
| 8A17.00 | Read | self monitoring of blood glucose                           |
| 8B3l.00 | Read | diabetes medication review                                 |
| 8BAi.00 | Read | insulin passport completed                                 |
| 8BAj.00 | Read | informed dissent not to carry insulin passport             |
| 8BAm.00 | Read | insulin passport checked                                   |

|         |      |                                                             |
|---------|------|-------------------------------------------------------------|
| 8BL2.00 | Read | patient on maximal tolerated therapy for diabetes           |
| 8CA4100 | Read | pt advised re diabetic diet                                 |
| 8CAQ.00 | Read | advice about blood glucose control                          |
| 8CE0100 | Read | insulin alert patient information booklet given             |
| 8CE0200 | Read | insulin passport given                                      |
| 8CMW700 | Read | diabetes clinical pathway                                   |
| 8CP2.00 | Read | transition of diabetes care options discussed               |
| 8CR2.00 | Read | diabetes clinical management plan                           |
| 8CS0.00 | Read | diabetes care plan agreed                                   |
| 8H2J.00 | Read | admit diabetic emergency                                    |
| 8H3O.00 | Read | non-urgent diabetic admission                               |
| 8H4e.00 | Read | referral to diabetes special interest general practitioner  |
| 8H4F.00 | Read | referral to diabetologist                                   |
| 8H7C.00 | Read | refer                                                       |
| 8H7f.00 | Read | referral to diabetes nurse                                  |
| 8H7r.00 | Read | refer to diabetic foot screener                             |
| 8HBG.00 | Read | diabetic retinopathy 12 month review                        |
| 8HBH.00 | Read | diabetic retinopathy 6 month review                         |
| 8Hg4.00 | Read | discharged from care of diabetes specialist nurse           |
| 8HgC.00 | Read | discharged from diabetes shared care programme              |
| 8HHy.00 | Read | referral to diabetic register                               |
| 8Hj0.00 | Read | referral to diabetes structured education programme         |
| 8Hj3.00 | Read | referral to dafne diabetes structured education programme   |
| 8Hj4.00 | Read | referral to desmond diabetes structured education programme |
| 8Hj5.00 | Read | referral to xpert diabetes structured education programme   |
| 8HKE.00 | Read | diabetology d.v. requested                                  |
| 8HI1.00 | Read | referral for diabetic retinopathy screening                 |
| 8HI4.00 | Read | referral to community diabetes specialist nurse             |
| 8HIc.00 | Read | referral to community diabetes service                      |
| 8HLE.00 | Read | diabetology d.v. done                                       |
| 8HME.00 | Read | listed for diabetology admissn                              |
| 8HTe.00 | Read | referral to diabetes preconception counselling clinic       |
| 8HTE100 | Read | referral to community diabetes clinic                       |
| 8HTi.00 | Read | referral to multidisciplinary diabetic clinic               |
| 8HTk.00 | Read | referral to diabetic eye clinic                             |
| 8HVU.00 | Read | private referral to diabetologist                           |
| 8I2P.00 | Read | sulphonylureas contraindicated                              |
| 8I2S.00 | Read | glitazones contraindicated                                  |
| 8I3k.00 | Read | insulin therapy declined                                    |
| 8I3W.00 | Read | diabetic foot examination declined                          |
| 8I3X.00 | Read | diabetic retinopathy screening refused                      |
| 8I57.00 | Read | patient held diabetic record declined                       |
| 8I6F.00 | Read | diabetic retinopathy screening not indicated                |
| 8I6G.00 | Read | diabetic foot examination not indicated                     |
| 8I7B.00 | Read | metformin not tolerated                                     |

|         |      |                                                              |
|---------|------|--------------------------------------------------------------|
| 8I7C.00 | Read | sulphonylureas not tolerated                                 |
| 8I81.00 | Read | did not complete diabetes structured education programme     |
| 8I82.00 | Read | did not complete dafne diabetes structured education program |
| 8I83.00 | Read | did not complete desmond diabetes structured educat program  |
| 8I84.00 | Read | did not complete xpert diabetes structured education program |
| 8IAs.00 | Read | diabetic dietary review declined                             |
| 8IE2.00 | Read | diabetes care plan declined                                  |
| 8IEa.00 | Read | referral to dafne diabetes structured educn prog declined    |
| 8IEQ.00 | Read | referral to community diabetes specialist nurse declined     |
| 8OA3.00 | Read | provision of written information about diabetes and driving  |
| 9360    | Read | patient held diabetic record issued                          |
| 93C4.00 | Read | patient consent given for addition to diabetic register      |
| 9b92000 | Read | diabetic medicine                                            |
| 9h4..00 | Read | exception reporting: diabetes quality indicators             |
| 9h41.00 | Read | excepted from diabetes qual indicators: patient unsuitable   |
| 9h42.00 | Read | excepted from diabetes quality indicators: informed dissent  |
| 9kL..00 | Read | insulin initiation - enhanced services administration        |
| 9m00.00 | Read | eligible for diabetic retinopathy screening                  |
| 9M00.00 | Read | informed consent for diabetes national audit                 |
| 9m0A.00 | Read | declined diabetic retinopathy screening                      |
| 9M10.00 | Read | informed dissent for diabetes national audit                 |
| 9N0m.00 | Read | seen in diabetic nurse consultant clinic                     |
| 9N0n.00 | Read | seen in community diabetes specialist clinic                 |
| 9N0o.00 | Read | seen in community diabetic specialist nurse clinic           |
| 9N1i.00 | Read | seen in diabetic foot clinic                                 |
| 9N1o.00 | Read | seen in multidisciplinary diabetic clinic                    |
| 9N1Q.00 | Read | seen in diabetic clinic                                      |
| 9N1v.00 | Read | seen in diabetic eye clinic                                  |
| 9N2d.00 | Read | seen by diabetologist                                        |
| 9N2i.00 | Read | seen by diabetic liaison nurse                               |
| 9N4I.00 | Read | dna - did not attend diabetic clinic                         |
| 9N4p.00 | Read | did not attend diabetic retinopathy clinic                   |
| 9NiA.00 | Read | did not attend diabetes structured education programme       |
| 9NiC.00 | Read | did not attend dafne diabetes structured education programme |
| 9NiD.00 | Read | did not attend desmond diabetes structured education program |
| 9NiE.00 | Read | did not attend xpert diabetes structured education programme |
| 9NiZ.00 | Read | did not attend diabetes foot screening                       |
| 9N14.00 | Read | seen by general practitioner special interest in diabetes    |
| 9NM0.00 | Read | attending diabetes clinic                                    |
| 9NN8.00 | Read | under care of diabetologist                                  |
| 9NN9.00 | Read | under care of diabetes specialist nurse                      |
| 9NND.00 | Read | under care of diabetic foot screener                         |
| 9OL..00 | Read | diabetes monitoring admin.                                   |
| 9OL1.00 | Read | attends diabetes monitoring                                  |
| 9OL..11 | Read | diabetes clinic administration                               |

|         |      |                                                             |
|---------|------|-------------------------------------------------------------|
| 9OL2.00 | Read | refuses diabetes monitoring                                 |
| 9OL3.00 | Read | diabetes monitoring default                                 |
| 9OL4.00 | Read | diabetes monitoring 1st letter                              |
| 9OL5.00 | Read | diabetes monitoring 2nd letter                              |
| 9OL6.00 | Read | diabetes monitoring 3rd letter                              |
| 9OL7.00 | Read | diabetes monitor.verbal invite                              |
| 9OL8.00 | Read | diabetes monitor.phone invite                               |
| 9OL9.00 | Read | diabetes monitoring deleted                                 |
| 9OLA.00 | Read | diabetes monitor. check done                                |
| 9OLA.11 | Read | diabetes monitored                                          |
| 9OLB.00 | Read | attended diabetes structured education programme            |
| 9OLD.00 | Read | diabetic patient unsuitable for digital retinal photography |
| 9OLE.00 | Read | attended desmond structured programme                       |
| 9OLF.00 | Read | diabetes structured education programme completed           |
| 9OLG.00 | Read | attended xpert diabetes structured education programme      |
| 9OLH.00 | Read | attended dafne diabetes structured education programme      |
| 9OLJ.00 | Read | dafne diabetes structured education programme completed     |
| 9OLK.00 | Read | desmond diabetes structured education programme completed   |
| 9OLL.00 | Read | xpert diabetes structured education programme completed     |
| 9OLM.00 | Read | diabetes structured education programme declined            |
| 9OLN.00 | Read | diabetes monitor invitation by sms (short message service)  |
| 9OLZ.00 | Read | diabetes monitoring admin.nos                               |
| 9Oy.00  | Read | diabetes screening administration                           |
| 9Oy0000 | Read | diabetic foot screening invitation                          |
| 9Oy0200 | Read | diabetic foot screening invitation first letter             |
| 9Oy0300 | Read | diabetic foot screening invitation second letter            |
| 9Oy0400 | Read | diabetic foot screening invitation third letter             |
| C10..00 | Read | diabetes mellitus                                           |
| C100.00 | Read | diabetes mellitus with no mention of complication           |
| C100000 | Read | diabetes mellitus                                           |
| C100011 | Read | insulin dependent diabetes mellitus                         |
| C100100 | Read | diabetes mellitus                                           |
| C100111 | Read | maturity onset diabetes                                     |
| C100112 | Read | non-insulin dependent diabetes mellitus                     |
| C100z00 | Read | diabetes mellitus nos with no mention of complication       |
| C101.00 | Read | diabetes mellitus with ketoacidosis                         |
| C101000 | Read | diabetes mellitus                                           |
| C101100 | Read | diabetes mellitus                                           |
| C101y00 | Read | other specified diabetes mellitus with ketoacidosis         |
| C101z00 | Read | diabetes mellitus nos with ketoacidosis                     |
| C102.00 | Read | diabetes mellitus with hyperosmolar coma                    |
| C102000 | Read | diabetes mellitus                                           |
| C102100 | Read | diabetes mellitus                                           |
| C102z00 | Read | diabetes mellitus nos with hyperosmolar coma                |
| C103.00 | Read | diabetes mellitus with ketoacidotic coma                    |

|         |      |                                                              |
|---------|------|--------------------------------------------------------------|
| C103000 | Read | diabetes mellitus                                            |
| C103100 | Read | diabetes mellitus                                            |
| C103y00 | Read | other specified diabetes mellitus with coma                  |
| C103z00 | Read | diabetes mellitus nos with ketoacidotic coma                 |
| C104.00 | Read | diabetes mellitus with renal manifestation                   |
| C104000 | Read | diabetes mellitus                                            |
| C104100 | Read | diabetes mellitus                                            |
| C104.11 | Read | diabetic nephropathy                                         |
| C104y00 | Read | other specified diabetes mellitus with renal complications   |
| C104z00 | Read | diabetes mellitus with nephropathy nos                       |
| C105.00 | Read | diabetes mellitus with ophthalmic manifestation              |
| C105000 | Read | diabetes mellitus                                            |
| C105100 | Read | diabetes mellitus                                            |
| C105y00 | Read | other specified diabetes mellitus with ophthalmic complicatn |
| C105z00 | Read | diabetes mellitus nos with ophthalmic manifestation          |
| C106.00 | Read | diabetes mellitus with neurological manifestation            |
| C106000 | Read | diabetes mellitus                                            |
| C106100 | Read | diabetes mellitus                                            |
| C106.11 | Read | diabetic amyotrophy                                          |
| C106.12 | Read | diabetes mellitus with neuropathy                            |
| C106.13 | Read | diabetes mellitus with polyneuropathy                        |
| C106y00 | Read | other specified diabetes mellitus with neurological comps    |
| C106z00 | Read | diabetes mellitus nos with neurological manifestation        |
| C107.00 | Read | diabetes mellitus with peripheral circulatory disorder       |
| C107000 | Read | diabetes mellitus                                            |
| C107100 | Read | diabetes mellitus                                            |
| C107.11 | Read | diabetes mellitus with gangrene                              |
| C107.12 | Read | diabetes with gangrene                                       |
| C107200 | Read | diabetes mellitus                                            |
| C107300 | Read | idm with peripheral circulatory disorder                     |
| C107400 | Read | niddm with peripheral circulatory disorder                   |
| C107z00 | Read | diabetes mellitus nos with peripheral circulatory disorder   |
| C108.00 | Read | insulin dependent diabetes mellitus                          |
| C108000 | Read | insulin-dependent diabetes mellitus with renal complications |
| C108011 | Read | type i diabetes mellitus with renal complications            |
| C108012 | Read | type 1 diabetes mellitus with renal complications            |
| C108100 | Read | insulin-dependent diabetes mellitus with ophthalmic comps    |
| C108.11 | Read | idm-insulin dependent diabetes mellitus                      |
| C108112 | Read | type 1 diabetes mellitus with ophthalmic complications       |
| C108.12 | Read | type 1 diabetes mellitus                                     |
| C108.13 | Read | type i diabetes mellitus                                     |
| C108200 | Read | insulin-dependent diabetes mellitus with neurological comps  |
| C108211 | Read | type i diabetes mellitus with neurological complications     |
| C108212 | Read | type 1 diabetes mellitus with neurological complications     |
| C108300 | Read | insulin dependent diabetes mellitus with multiple complicatn |



|         |      |                                                             |
|---------|------|-------------------------------------------------------------|
| C108311 | Read | type i diabetes mellitus with multiple complications        |
| C108400 | Read | unstable insulin dependent diabetes mellitus                |
| C108411 | Read | unstable type i diabetes mellitus                           |
| C108412 | Read | unstable type 1 diabetes mellitus                           |
| C108500 | Read | insulin dependent diabetes mellitus with ulcer              |
| C108511 | Read | type i diabetes mellitus with ulcer                         |
| C108512 | Read | type 1 diabetes mellitus with ulcer                         |
| C108600 | Read | insulin dependent diabetes mellitus with gangrene           |
| C108700 | Read | insulin dependent diabetes mellitus with retinopathy        |
| C108711 | Read | type i diabetes mellitus with retinopathy                   |
| C108712 | Read | type 1 diabetes mellitus with retinopathy                   |
| C108800 | Read | insulin dependent diabetes mellitus - poor control          |
| C108811 | Read | type i diabetes mellitus - poor control                     |
| C108812 | Read | type 1 diabetes mellitus - poor control                     |
| C108900 | Read | insulin dependent diabetes maturity onset                   |
| C108911 | Read | type i diabetes mellitus maturity onset                     |
| C108912 | Read | type 1 diabetes mellitus maturity onset                     |
| C108A00 | Read | insulin-dependent diabetes without complication             |
| C108A11 | Read | type i diabetes mellitus without complication               |
| C108B00 | Read | insulin dependent diabetes mellitus with mononeuropathy     |
| C108B11 | Read | type i diabetes mellitus with mononeuropathy                |
| C108C00 | Read | insulin dependent diabetes mellitus with polyneuropathy     |
| C108D00 | Read | insulin dependent diabetes mellitus with nephropathy        |
| C108D11 | Read | type i diabetes mellitus with nephropathy                   |
| C108E00 | Read | insulin dependent diabetes mellitus with hypoglycaemic coma |
| C108E11 | Read | type i diabetes mellitus with hypoglycaemic coma            |
| C108E12 | Read | type 1 diabetes mellitus with hypoglycaemic coma            |
| C108F00 | Read | insulin dependent diabetes mellitus with diabetic cataract  |
| C108F11 | Read | type i diabetes mellitus with diabetic cataract             |
| C108G00 | Read | insulin dependent diab mell with peripheral angiopathy      |
| C108H00 | Read | insulin dependent diabetes mellitus with arthropathy        |
| C108H11 | Read | type i diabetes mellitus with arthropathy                   |
| C108J00 | Read | insulin dependent diab mell with neuropathic arthropathy    |
| C108J11 | Read | type i diabetes mellitus with neuropathic arthropathy       |
| C108J12 | Read | type 1 diabetes mellitus with neuropathic arthropathy       |
| C108y00 | Read | other specified diabetes mellitus with multiple comps       |
| C108z00 | Read | unspecified diabetes mellitus with multiple complications   |
| C109.00 | Read | non-insulin dependent diabetes mellitus                     |
| C109000 | Read | non-insulin-dependent diabetes mellitus with renal comps    |
| C109011 | Read | type ii diabetes mellitus with renal complications          |
| C109012 | Read | type 2 diabetes mellitus with renal complications           |
| C109100 | Read | non-insulin-dependent diabetes mellitus with ophthalm comps |
| C109.11 | Read | niddm - non-insulin dependent diabetes mellitus             |
| C109111 | Read | type ii diabetes mellitus with ophthalmic complications     |
| C109112 | Read | type 2 diabetes mellitus with ophthalmic complications      |

|         |      |                                                              |
|---------|------|--------------------------------------------------------------|
| C109.12 | Read | type 2 diabetes mellitus                                     |
| C109.13 | Read | type ii diabetes mellitus                                    |
| C109200 | Read | non-insulin-dependent diabetes mellitus with neuro comps     |
| C109211 | Read | type ii diabetes mellitus with neurological complications    |
| C109212 | Read | type 2 diabetes mellitus with neurological complications     |
| C109300 | Read | non-insulin-dependent diabetes mellitus with multiple comps  |
| C109312 | Read | type 2 diabetes mellitus with multiple complications         |
| C109400 | Read | non-insulin dependent diabetes mellitus with ulcer           |
| C109411 | Read | type ii diabetes mellitus with ulcer                         |
| C109412 | Read | type 2 diabetes mellitus with ulcer                          |
| C109500 | Read | non-insulin dependent diabetes mellitus with gangrene        |
| C109511 | Read | type ii diabetes mellitus with gangrene                      |
| C109512 | Read | type 2 diabetes mellitus with gangrene                       |
| C109600 | Read | non-insulin-dependent diabetes mellitus with retinopathy     |
| C109611 | Read | type ii diabetes mellitus with retinopathy                   |
| C109612 | Read | type 2 diabetes mellitus with retinopathy                    |
| C109700 | Read | non-insulin dependent diabetes mellitus - poor control       |
| C109711 | Read | type ii diabetes mellitus - poor control                     |
| C109712 | Read | type 2 diabetes mellitus - poor control                      |
| C109900 | Read | non-insulin-dependent diabetes mellitus without complication |
| C109912 | Read | type 2 diabetes mellitus without complication                |
| C109A00 | Read | non-insulin dependent diabetes mellitus with mononeuropathy  |
| C109A11 | Read | type ii diabetes mellitus with mononeuropathy                |
| C109B00 | Read | non-insulin dependent diabetes mellitus with polyneuropathy  |
| C109B11 | Read | type ii diabetes mellitus with polyneuropathy                |
| C109C00 | Read | non-insulin dependent diabetes mellitus with nephropathy     |
| C109C11 | Read | type ii diabetes mellitus with nephropathy                   |
| C109C12 | Read | type 2 diabetes mellitus with nephropathy                    |
| C109D00 | Read | non-insulin dependent diabetes mellitus with hypoglyca coma  |
| C109D11 | Read | type ii diabetes mellitus with hypoglycaemic coma            |
| C109D12 | Read | type 2 diabetes mellitus with hypoglycaemic coma             |
| C109E00 | Read | non-insulin depend diabetes mellitus with diabetic cataract  |
| C109E11 | Read | type ii diabetes mellitus with diabetic cataract             |
| C109E12 | Read | type 2 diabetes mellitus with diabetic cataract              |
| C109F00 | Read | non-insulin-dependent d m with peripheral angiopath          |
| C109F11 | Read | type ii diabetes mellitus with peripheral angiopathy         |
| C109F12 | Read | type 2 diabetes mellitus with peripheral angiopathy          |
| C109G00 | Read | non-insulin dependent diabetes mellitus with arthropathy     |
| C109G11 | Read | type ii diabetes mellitus with arthropathy                   |
| C109G12 | Read | type 2 diabetes mellitus with arthropathy                    |
| C109H00 | Read | non-insulin dependent d m with neuropathic arthropathy       |
| C109H11 | Read | type ii diabetes mellitus with neuropathic arthropathy       |
| C109H12 | Read | type 2 diabetes mellitus with neuropathic arthropathy        |
| C109J00 | Read | insulin treated type 2 diabetes mellitus                     |
| C109J11 | Read | insulin treated non-insulin dependent diabetes mellitus      |

|         |      |                                                              |
|---------|------|--------------------------------------------------------------|
| C109J12 | Read | insulin treated type ii diabetes mellitus                    |
| C109K00 | Read | hyperosmolar non-ketotic state in type 2 diabetes mellitus   |
| C10B.00 | Read | diabetes mellitus induced by steroids                        |
| C10B000 | Read | steroid induced diabetes mellitus without complication       |
| C10C.00 | Read | diabetes mellitus autosomal dominant                         |
| C10C.11 | Read | maturity onset diabetes in youth                             |
| C10C.12 | Read | maturity onset diabetes in youth type 1                      |
| C10D.00 | Read | diabetes mellitus autosomal dominant type 2                  |
| C10D.11 | Read | maturity onset diabetes in youth type 2                      |
| C10E.00 | Read | type 1 diabetes mellitus                                     |
| C10E000 | Read | type 1 diabetes mellitus with renal complications            |
| C10E012 | Read | insulin-dependent diabetes mellitus with renal complications |
| C10E100 | Read | type 1 diabetes mellitus with ophthalmic complications       |
| C10E.11 | Read | type i diabetes mellitus                                     |
| C10E111 | Read | type i diabetes mellitus with ophthalmic complications       |
| C10E112 | Read | insulin-dependent diabetes mellitus with ophthalmic comps    |
| C10E.12 | Read | insulin dependent diabetes mellitus                          |
| C10E200 | Read | type 1 diabetes mellitus with neurological complications     |
| C10E212 | Read | insulin-dependent diabetes mellitus with neurological comps  |
| C10E300 | Read | type 1 diabetes mellitus with multiple complications         |
| C10E311 | Read | type i diabetes mellitus with multiple complications         |
| C10E312 | Read | insulin dependent diabetes mellitus with multiple complicat  |
| C10E400 | Read | unstable type 1 diabetes mellitus                            |
| C10E411 | Read | unstable type i diabetes mellitus                            |
| C10E412 | Read | unstable insulin dependent diabetes mellitus                 |
| C10E500 | Read | type 1 diabetes mellitus with ulcer                          |
| C10E511 | Read | type i diabetes mellitus with ulcer                          |
| C10E512 | Read | insulin dependent diabetes mellitus with ulcer               |
| C10E600 | Read | type 1 diabetes mellitus with gangrene                       |
| C10E611 | Read | type i diabetes mellitus with gangrene                       |
| C10E700 | Read | type 1 diabetes mellitus with retinopathy                    |
| C10E711 | Read | type i diabetes mellitus with retinopathy                    |
| C10E712 | Read | insulin dependent diabetes mellitus with retinopathy         |
| C10E800 | Read | type 1 diabetes mellitus - poor control                      |
| C10E811 | Read | type i diabetes mellitus - poor control                      |
| C10E812 | Read | insulin dependent diabetes mellitus - poor control           |
| C10E900 | Read | type 1 diabetes mellitus maturity onset                      |
| C10E911 | Read | type i diabetes mellitus maturity onset                      |
| C10E912 | Read | insulin dependent diabetes maturity onset                    |
| C10EA00 | Read | type 1 diabetes mellitus without complication                |
| C10EA11 | Read | type i diabetes mellitus without complication                |
| C10EA12 | Read | insulin-dependent diabetes without complication              |
| C10EB00 | Read | type 1 diabetes mellitus with mononeuropathy                 |
| C10EC00 | Read | type 1 diabetes mellitus with polyneuropathy                 |
| C10EC11 | Read | type i diabetes mellitus with polyneuropathy                 |

|         |      |                                                             |
|---------|------|-------------------------------------------------------------|
| C10EC12 | Read | insulin dependent diabetes mellitus with polyneuropathy     |
| C10ED00 | Read | type 1 diabetes mellitus with nephropathy                   |
| C10ED12 | Read | insulin dependent diabetes mellitus with nephropathy        |
| C10EE00 | Read | type 1 diabetes mellitus with hypoglycaemic coma            |
| C10EE12 | Read | insulin dependent diabetes mellitus with hypoglycaemic coma |
| C10EF00 | Read | type 1 diabetes mellitus with diabetic cataract             |
| C10EF12 | Read | insulin dependent diabetes mellitus with diabetic cataract  |
| C10EG00 | Read | type 1 diabetes mellitus with peripheral angiopathy         |
| C10EH00 | Read | type 1 diabetes mellitus with arthropathy                   |
| C10EJ00 | Read | type 1 diabetes mellitus with neuropathic arthropathy       |
| C10EK00 | Read | type 1 diabetes mellitus with persistent proteinuria        |
| C10EL00 | Read | type 1 diabetes mellitus with persistent microalbuminuria   |
| C10EL11 | Read | type i diabetes mellitus with persistent microalbuminuria   |
| C10EM00 | Read | type 1 diabetes mellitus with ketoacidosis                  |
| C10EM11 | Read | type i diabetes mellitus with ketoacidosis                  |
| C10EN00 | Read | type 1 diabetes mellitus with ketoacidotic coma             |
| C10EN11 | Read | type i diabetes mellitus with ketoacidotic coma             |
| C10EP00 | Read | type 1 diabetes mellitus with exudative maculopathy         |
| C10EP11 | Read | type i diabetes mellitus with exudative maculopathy         |
| C10EQ00 | Read | type 1 diabetes mellitus with gastroparesis                 |
| C10ER00 | Read | latent autoimmune diabetes mellitus in adult                |
| C10F.00 | Read | type 2 diabetes mellitus                                    |
| C10F000 | Read | type 2 diabetes mellitus with renal complications           |
| C10F011 | Read | type ii diabetes mellitus with renal complications          |
| C10F100 | Read | type 2 diabetes mellitus with ophthalmic complications      |
| C10F.11 | Read | type ii diabetes mellitus                                   |
| C10F111 | Read | type ii diabetes mellitus with ophthalmic complications     |
| C10F200 | Read | type 2 diabetes mellitus with neurological complications    |
| C10F211 | Read | type ii diabetes mellitus with neurological complications   |
| C10F300 | Read | type 2 diabetes mellitus with multiple complications        |
| C10F311 | Read | type ii diabetes mellitus with multiple complications       |
| C10F400 | Read | type 2 diabetes mellitus with ulcer                         |
| C10F411 | Read | type ii diabetes mellitus with ulcer                        |
| C10F500 | Read | type 2 diabetes mellitus with gangrene                      |
| C10F511 | Read | type ii diabetes mellitus with gangrene                     |
| C10F600 | Read | type 2 diabetes mellitus with retinopathy                   |
| C10F611 | Read | type ii diabetes mellitus with retinopathy                  |
| C10F700 | Read | type 2 diabetes mellitus - poor control                     |
| C10F711 | Read | type ii diabetes mellitus - poor control                    |
| C10F900 | Read | type 2 diabetes mellitus without complication               |
| C10F911 | Read | type ii diabetes mellitus without complication              |
| C10FA00 | Read | type 2 diabetes mellitus with mononeuropathy                |
| C10FA11 | Read | type ii diabetes mellitus with mononeuropathy               |
| C10FB00 | Read | type 2 diabetes mellitus with polyneuropathy                |
| C10FB11 | Read | type ii diabetes mellitus with polyneuropathy               |

|         |      |                                                             |
|---------|------|-------------------------------------------------------------|
| C10FC00 | Read | type 2 diabetes mellitus with nephropathy                   |
| C10FC11 | Read | type ii diabetes mellitus with nephropathy                  |
| C10FD00 | Read | type 2 diabetes mellitus with hypoglycaemic coma            |
| C10FD11 | Read | type ii diabetes mellitus with hypoglycaemic coma           |
| C10FE00 | Read | type 2 diabetes mellitus with diabetic cataract             |
| C10FE11 | Read | type ii diabetes mellitus with diabetic cataract            |
| C10FF00 | Read | type 2 diabetes mellitus with peripheral angiopathy         |
| C10FF11 | Read | type ii diabetes mellitus with peripheral angiopathy        |
| C10FG00 | Read | type 2 diabetes mellitus with arthropathy                   |
| C10FG11 | Read | type ii diabetes mellitus with arthropathy                  |
| C10FH00 | Read | type 2 diabetes mellitus with neuropathic arthropathy       |
| C10FJ00 | Read | insulin treated type 2 diabetes mellitus                    |
| C10FJ11 | Read | insulin treated type ii diabetes mellitus                   |
| C10FK00 | Read | hyperosmolar non-ketotic state in type 2 diabetes mellitus  |
| C10FK11 | Read | hyperosmolar non-ketotic state in type ii diabetes mellitus |
| C10FL00 | Read | type 2 diabetes mellitus with persistent proteinuria        |
| C10FL11 | Read | type ii diabetes mellitus with persistent proteinuria       |
| C10FM00 | Read | type 2 diabetes mellitus with persistent microalbuminuria   |
| C10FM11 | Read | type ii diabetes mellitus with persistent microalbuminuria  |
| C10FN00 | Read | type 2 diabetes mellitus with ketoacidosis                  |
| C10FN11 | Read | type ii diabetes mellitus with ketoacidosis                 |
| C10FP00 | Read | type 2 diabetes mellitus with ketoacidotic coma             |
| C10FP11 | Read | type ii diabetes mellitus with ketoacidotic coma            |
| C10FQ00 | Read | type 2 diabetes mellitus with exudative maculopathy         |
| C10FR00 | Read | type 2 diabetes mellitus with gastroparesis                 |
| C10FS00 | Read | maternally inherited diabetes mellitus                      |
| C10G.00 | Read | secondary pancreatic diabetes mellitus                      |
| C10G000 | Read | secondary pancreatic diabetes mellitus without complication |
| C10M.00 | Read | lipotrophic diabetes mellitus                               |
| C10N.00 | Read | secondary diabetes mellitus                                 |
| C10N000 | Read | secondary diabetes mellitus without complication            |
| C10N100 | Read | cystic fibrosis related diabetes mellitus                   |
| C10y.00 | Read | diabetes mellitus with other specified manifestation        |
| C10y100 | Read | diabetes mellitus                                           |
| C10yy00 | Read | other specified diabetes mellitus with other spec comps     |
| C10yz00 | Read | diabetes mellitus nos with other specified manifestation    |
| C10z.00 | Read | diabetes mellitus with unspecified complication             |
| C10z000 | Read | diabetes mellitus                                           |
| C10z100 | Read | diabetes mellitus                                           |
| C10zy00 | Read | other specified diabetes mellitus with unspecified comps    |
| C10zz00 | Read | diabetes mellitus nos with unspecified complication         |
| C110000 | Read | iatrogenic hyperinsulinism                                  |
| C110.11 | Read | insulin coma                                                |
| C11y000 | Read | steroid induced diabetes                                    |
| C314.11 | Read | renal diabetes                                              |

|         |      |                                                           |
|---------|------|-----------------------------------------------------------|
| C350011 | Read | bronzed diabetes                                          |
| Cyu2.00 | Read | [x]diabetes mellitus                                      |
| Cyu2000 | Read | [x]other specified diabetes mellitus                      |
| Cyu2300 | Read | [x]unspecified diabetes mellitus with renal complications |
| F171100 | Read | autonomic neuropathy due to diabetes                      |
| F345000 | Read | diabetic mononeuritis multiplex                           |
| F35z000 | Read | diabetic mononeuritis nos                                 |
| F372.00 | Read | polyneuropathy in diabetes                                |
| F372000 | Read | acute painful diabetic neuropathy                         |
| F372100 | Read | chronic painful diabetic neuropathy                       |
| F372.11 | Read | diabetic polyneuropathy                                   |
| F372.12 | Read | diabetic neuropathy                                       |
| F372200 | Read | asymptomatic diabetic neuropathy                          |
| F381300 | Read | myasthenic syndrome due to diabetic amyotrophy            |
| F381311 | Read | diabetic amyotrophy                                       |
| F3y0.00 | Read | diabetic mononeuropathy                                   |
| F420.00 | Read | diabetic retinopathy                                      |
| F420000 | Read | background diabetic retinopathy                           |
| F420100 | Read | proliferative diabetic retinopathy                        |
| F420200 | Read | preproliferative diabetic retinopathy                     |
| F420300 | Read | advanced diabetic maculopathy                             |
| F420400 | Read | diabetic maculopathy                                      |
| F420500 | Read | advanced diabetic retinal disease                         |
| F420600 | Read | non proliferative diabetic retinopathy                    |
| F420700 | Read | high risk proliferative diabetic retinopathy              |
| F420800 | Read | high risk non proliferative diabetic retinopathy          |
| F420z00 | Read | diabetic retinopathy nos                                  |
| F440700 | Read | diabetic iritis                                           |
| F464000 | Read | diabetic cataract                                         |
| G73y000 | Read | diabetic peripheral angiopathy                            |
| K01x100 | Read | nephrotic syndrome in diabetes mellitus                   |
| K01x111 | Read | kimmelstiel - wilson disease                              |
| K08yA00 | Read | proteinuric diabetic nephropathy                          |
| K08yA11 | Read | clinical diabetic nephropathy                             |
| K27y700 | Read | erectile dysfunction due to diabetes mellitus             |
| Kyu0300 | Read | [x]glomerular disorders in diabetes mellitus              |
| L180500 | Read | pre-existing diabetes mellitus                            |
| L180600 | Read | pre-existing diabetes mellitus                            |
| L180X00 | Read | pre-existing diabetes mellitus                            |
| M037200 | Read | cellulitis in diabetic foot                               |
| M21yC00 | Read | insulin lipohypertrophy                                   |
| M21yC11 | Read | insulin site lipohypertrophy                              |
| M271000 | Read | ischaemic ulcer diabetic foot                             |
| M271100 | Read | neuropathic diabetic ulcer - foot                         |
| M271200 | Read | mixed diabetic ulcer - foot                               |

|         |      |                                                              |
|---------|------|--------------------------------------------------------------|
| N030000 | Read | diabetic cheiroarthropathy                                   |
| N030011 | Read | diabetic cheiropathy                                         |
| N030100 | Read | diabetic charcot arthropathy                                 |
| R054200 | Read | [d]gangrene of toe in diabetic                               |
| R054300 | Read | [d]widespread diabetic foot gangrene                         |
| R105712 | Read | [d]hyperglycaemia                                            |
| Ryu8A00 | Read | [x]hyperglycaemia                                            |
| TJ23.00 | Read | adverse reaction to insulins and antidiabetic agents         |
| TJ23000 | Read | adverse reaction to insulins                                 |
| TJ23200 | Read | adverse reaction to chlorpropamide                           |
| TJ23300 | Read | adverse reaction to glibenclamide                            |
| TJ23400 | Read | adverse reaction to gliclazide                               |
| TJ23500 | Read | adverse reaction to glipizide                                |
| TJ23800 | Read | adverse reaction to tolazamide                               |
| TJ23900 | Read | adverse reaction to tolbutamide                              |
| TJ23A00 | Read | adverse reaction to metformin hydrochloride                  |
| TJ23B00 | Read | adverse reaction to glucagon                                 |
| TJ23z00 | Read | adverse reaction to insulins and antidiabetic agents nos     |
| U602300 | Read | [x]insul/oral hypoglyc drugs caus adverse eff therapeut use  |
| U602311 | Read | [x] adverse reaction to insulins and antidiabetic agents     |
| U602312 | Read | [x] adverse reaction to insulins                             |
| U602315 | Read | [x] adverse reaction to glibenclamide                        |
| U602316 | Read | [x] adverse reaction to gliclazide                           |
| U602317 | Read | [x] adverse reaction to glipzide                             |
| U602318 | Read | [x] adverse reaction to gliquidone                           |
| U60231A | Read | [x] adverse reaction to tolazamide                           |
| U60231B | Read | [x] adverse reaction to tolbutamide                          |
| U60231C | Read | [x] adverse reaction to metformin hydrochloride              |
| U60231E | Read | [x] adverse reaction to insulins and antidiabetic agents nos |
| ZC2C800 | Read | dietary advice for diabetes mellitus                         |
| ZC2C900 | Read | dietary advice for type i diabetes                           |
| ZC2CA00 | Read | dietary advice for type ii diabetes                          |
| ZL22500 | Read | under care of diabetic liaison nurse                         |
| ZL62500 | Read | referral to diabetes nurse                                   |
| ZL62600 | Read | referral to diabetic liaison nurse                           |
| ZLA2500 | Read | seen by diabetic liaison nurse                               |
| ZLD7500 | Read | discharge by diabetic liaison nurse                          |
| ZRB4.00 | Read | diabetes clinic satisfaction questionnaire                   |
| ZRB4.11 | Read | csq - diabetes clinic satisfaction questionnaire             |
| ZRB5.00 | Read | diabetes treatment satisfaction questionnaire                |
| ZRB5.11 | Read | dtsq - diabetes treatment satisfaction questionnaire         |
| ZRB6.00 | Read | diabetes wellbeing questionnaire                             |
| ZRB6.11 | Read | dwbq - diabetes wellbeing questionnaire                      |
| ZRBa.00 | Read | education score - diabetes                                   |
| ZRbH.00 | Read | perceived control of insulin-dependent diabetes              |

|         |        |                                             |
|---------|--------|---------------------------------------------|
| ZV65312 | Read   | [v]dietary counselling in diabetes mellitus |
| ZV6DA00 | Read   | [v]admitted for commencement of insulin     |
| ZV6DB00 | Read   | [v]admitted for conversion to insulin       |
| E10     | ICD-10 | insulin-dependent diabetes mellitus         |
| E10.0   | ICD-10 | insulin-dependent diabetes mellitus         |
| E10.1   | ICD-10 | insulin-dependent diabetes mellitus         |
| E10.2   | ICD-10 | insulin-dependent diabetes mellitus         |
| E10.3   | ICD-10 | insulin-dependent diabetes mellitus         |
| E10.4   | ICD-10 | insulin-dependent diabetes mellitus         |
| E10.5   | ICD-10 | insulin-dependent diabetes mellitus         |
| E10.6   | ICD-10 | insulin-dependent diabetes mellitus         |
| E10.7   | ICD-10 | insulin-dependent diabetes mellitus         |
| E10.8   | ICD-10 | insulin-dependent diabetes mellitus         |
| E10.9   | ICD-10 | insulin-dependent diabetes mellitus         |
| E11     | ICD-10 | non-insulin-dependent diabetes mellitus     |
| E11.0   | ICD-10 | non-insulin-dependent diabetes mellitus     |
| E11.1   | ICD-10 | non-insulin-dependent diabetes mellitus     |
| E11.2   | ICD-10 | non-insulin-dependent diabetes mellitus     |
| E11.3   | ICD-10 | non-insulin-dependent diabetes mellitus     |
| E11.4   | ICD-10 | non-insulin-dependent diabetes mellitus     |
| E11.5   | ICD-10 | non-insulin-dependent diabetes mellitus     |
| E11.6   | ICD-10 | non-insulin-dependent diabetes mellitus     |
| E11.7   | ICD-10 | non-insulin-dependent diabetes mellitus     |
| E11.8   | ICD-10 | non-insulin-dependent diabetes mellitus     |
| E11.9   | ICD-10 | non-insulin-dependent diabetes mellitus     |
| E13     | ICD-10 | other specified diabetes mellitus           |
| E13.0   | ICD-10 | other specified diabetes mellitus           |
| E13.1   | ICD-10 | other specified diabetes mellitus           |
| E13.2   | ICD-10 | other specified diabetes mellitus           |
| E13.3   | ICD-10 | other specified diabetes mellitus           |
| E13.4   | ICD-10 | other specified diabetes mellitus           |
| E13.5   | ICD-10 | other specified diabetes mellitus           |
| E13.6   | ICD-10 | other specified diabetes mellitus           |
| E13.7   | ICD-10 | other specified diabetes mellitus           |
| E13.8   | ICD-10 | other specified diabetes mellitus           |
| E13.9   | ICD-10 | other specified diabetes mellitus           |
| E14     | ICD-10 | unspecified diabetes mellitus               |
| E14.0   | ICD-10 | unspecified diabetes mellitus               |
| E14.1   | ICD-10 | unspecified diabetes mellitus               |
| E14.2   | ICD-10 | unspecified diabetes mellitus               |
| E14.3   | ICD-10 | unspecified diabetes mellitus               |
| E14.4   | ICD-10 | unspecified diabetes mellitus               |
| E14.5   | ICD-10 | unspecified diabetes mellitus               |
| E14.6   | ICD-10 | unspecified diabetes mellitus               |
| E14.7   | ICD-10 | unspecified diabetes mellitus               |



|       |        |                                                     |
|-------|--------|-----------------------------------------------------|
| E14.8 | ICD-10 | unspecified diabetes mellitus                       |
| E14.9 | ICD-10 | unspecified diabetes mellitus                       |
| G59.0 | ICD-10 | diabetic mononeuropathy                             |
| G63.2 | ICD-10 | diabetic polyneuropathy                             |
| H28.0 | ICD-10 | diabetic cataract                                   |
| H36.0 | ICD-10 | diabetic retinopathy                                |
| M14.2 | ICD-10 | diabetic arthropathy                                |
| N08.3 | ICD-10 | glomerular disorders in diabetes mellitus           |
| Y42.3 | ICD-10 | insulin and oral hypoglycaemic [antidiabetic] drugs |

## **Death**

Date of death registered in CPRD
