# Supplementary material for: Adherence to guidelines for creatinine and potassium monitoring and discontinuation following renin–angiotensin system blockade: a UK general practice-based cohort study
Source: PubMed Central journal article supplement — BMJ Open. 2017 Jan 9;7(1):e012818. doi: 10.1136/bmjopen-2016-012818 (PMC5223644; doi:10.1136/bmjopen-2016-012818), 2017-01-09
Supplement: bmjopen-2016-012818supp_tables.pdf [file bmjopen-2016-012818supp_tables.pdf]

## ONLINE SUPPLEMENTAL MATERIAL

**eTable 1.** Prevalence of baseline and follow-up serum creatinine monitoring among patients initiating renin-angiotensin system blockade according to clinical guideline recommendations, overall and in most recent calendar period (extended version of Table 3)

|                                      | Clinical guidelines   |          |                      |         |                         |                | All initiators                                     |                                                 | Continuing users*                                     |                                                 |
|--------------------------------------|-----------------------|----------|----------------------|---------|-------------------------|----------------|----------------------------------------------------|-------------------------------------------------|-------------------------------------------------------|-------------------------------------------------|
|                                      | NICE<br>Heart Failure | NICE CKD | NICE<br>Hypertension | NICE MI | UK Renal<br>Association | GP<br>Notebook | Generous baseline<br>interpretation<br>(≤12 month) | Strict baseline<br>interpretation<br>(≤1 month) | Generous<br>baseline<br>interpretation<br>(≤12 month) | Strict baseline<br>interpretation<br>(≤1 month) |
| <b>2004-2014</b>                     |                       |          |                      |         |                         |                | n=223,814 (100%)                                   |                                                 | n=173,244 (100%)                                      |                                                 |
| <b>Baseline testing</b>              | x                     | x        | x                    | x       | x                       | x              | 169,218 (76%)                                      | 75,476 (34%)                                    | 132,156 (76%)                                         | 58,668 (34%)                                    |
| <b>Follow-up test (≤2 weeks)†</b>    | x                     | x        | n/a                  | x       | x                       | x              | 46,486 (21%)                                       | 19,679 (9%)                                     | 43,420 (25%)                                          | 18,457 (11%)                                    |
| + At least within one year after     |                       |          |                      | x       |                         |                | 36,424 (16%)                                       | 15,642 (7%)                                     | 34,336 (20%)                                          | 14,800 (9%)                                     |
| + 1 month thereafter‡                |                       |          |                      |         |                         | x              | 11,866 (5%)                                        | 5,643 (3%)                                      | 11,298 (7%)                                           | 5,388 (3%)                                      |
| + 1 and 3 months thereafter ‡        |                       |          |                      |         |                         | x              | 5,787 (3%)                                         | 2,933 (1%)                                      | 5,516 (3%)                                            | 2,791 (2%)                                      |
| + 1, 3, and 6 months thereafter ‡    |                       |          |                      |         |                         | x              | 3,390 (2%)                                         | 1,807 (1%)                                      | 3,201 (2%)                                            | 1,703 (1%)                                      |
| + 1, 3, 6, and 12 months thereafter‡ |                       |          |                      |         |                         | x              | 2,618 (1%)                                         | 1,439 (1%)                                      | 2,464 (1%)                                            | 1,353 (1%)                                      |
| <b>Follow-up test (≤3 weeks)§</b>    |                       |          |                      |         |                         |                | 70,792 (32%)                                       | 30,451 (14%)                                    | 66,340 (38%)                                          | 28,644 (17%)                                    |
| <b>2009-2014</b>                     |                       |          |                      |         |                         |                | n=87,623 (100%)                                    |                                                 | n=68,042 (100%)                                       |                                                 |
| <b>Baseline testing</b>              | x                     | x        | x                    | x       | x                       | x              | 67,649 (77%)                                       | 30,576 (35%)                                    | 52,760 (78%)                                          | 23,716 (35%)                                    |
| <b>Follow-up test (≤2 weeks)†</b>    | x                     | x        | n/a                  | x       | x                       | x              | 20,172 (23%)                                       | 8,707 (10%)                                     | 18,862 (28%)                                          | 8,169 (12%)                                     |
| + At least within one year after     |                       |          |                      | x       |                         |                | 15,416 (18%)                                       | 6,726 (8%)                                      | 14,557 (21%)                                          | 6,377 (9%)                                      |
| + 1 month thereafter‡                |                       |          |                      |         |                         | x              | 5,373 (6%)                                         | 2,607 (3%)                                      | 5,123 (8%)                                            | 2,500 (4%)                                      |
| + 1 and 3 months thereafter ‡        |                       |          |                      |         |                         | x              | 2,614 (3%)                                         | 1,365 (2%)                                      | 2,492 (4%)                                            | 1,302 (2%)                                      |
| + 1, 3, and 6 months thereafter ‡    |                       |          |                      |         |                         | x              | 1,525 (2%)                                         | 841 (1%)                                        | 1,437 (2%)                                            | 792 (1%)                                        |
| + 1, 3, 6, and 12 months thereafter‡ |                       |          |                      |         |                         | x              | 1,152 (1%)                                         | 650 (1%)                                        | 1,079 (2%)                                            | 606 (1%)                                        |
| <b>Follow-up test (≤3 weeks)§</b>    |                       |          |                      |         |                         |                | 31,007 (35%)                                       | 13,511 (15%)                                    | 29,081 (43%)                                          | 12,726 (19%)                                    |

Abbreviations: CKD, chronic kidney disease; GP, General Practice; MI, myocardial infarction; n/a, not specified

\* A patient was considered continuous users when the end date of the first continuous course of therapy was larger than the date of the first follow-up monitoring + 30 days (to allow for stock piling and irregular use)

†Follow-up test among those with baseline measurements

‡Within additional 1, 3, 6, and 12 months after correspond to within 1.5, 3.5, 6.5, and 12.5 months after ACE/ARB initiation, respectively.

§Sensitivity analysis illustrating the importance of 2 vs. 3-week cut-off interval in follow-up test intervals.

**eTable 2.** Prevalence of baseline and follow-up serum creatinine monitoring among patients initiating angiotensin converting-enzyme inhibitors or angiotensin-receptor blockers, overall and most recent calendar period (extended version of Table 1)

|                          | S-Creatinine, $\geq 1$ test, n (%) |                             |
|--------------------------|------------------------------------|-----------------------------|
|                          | Total cohort (n=223,814)           | 2009-2014 cohort (n=87,623) |
| <b>Baseline testing</b>  |                                    |                             |
| ≤12 months before        | 169,218 (75.6)                     | 67,649 (77.2)               |
| ≤3 months before         | 115,348 (51.5)                     | 46,925 (53.6)               |
| ≤1 months before         | 75,476 (33.7)                      | 30,576 (34.9)               |
| <b>Follow-up testing</b> |                                    |                             |
| ≤2 weeks after           | 65,090 (29.1)                      | 27,933 (31.9)               |
| ≤1 month after           | 114,244 (51.0)                     | 48,877 (55.8)               |
| ≤2 months after          | 139,044 (62.1)                     | 58,334 (66.6)               |

**eTable 3.** Prevalence of baseline and follow-up serum creatinine monitoring among patients initiating renin-angiotensin system blockade according to clinical guideline recommendations

|                                                       | All initiators<br>n=223,814 (100%)              |                                              |
|-------------------------------------------------------|-------------------------------------------------|----------------------------------------------|
|                                                       | Generous baseline<br>interpretation (≤12 month) | Strict baseline<br>interpretation (≤1 month) |
| <b>Overall (n=223,814)</b>                            |                                                 |                                              |
| Baseline testing                                      | 169,218 (76%)                                   | 75,476 (34%)                                 |
| + Follow-up test ≤2 weeks*                            | 46,486 (21%)                                    | 19,679 (9%)                                  |
| + Follow-up test ≤3 weeks†                            | 70,792 (32%)                                    | 30,451 (14%)                                 |
| <b>Overall, no recent hospitalization (n=197,291)</b> |                                                 |                                              |
| Baseline testing                                      | 153,353 (78%)                                   | 68,883 (35%)                                 |
| + Follow-up test ≤2 weeks*                            | 42,967 (22%)                                    | 18,222 (9%)                                  |
| + Follow-up test ≤3 weeks†                            | 65,881 (33%)                                    | 28,375 (14%)                                 |
| <b>Heart failure patients (n=10,807)</b>              |                                                 |                                              |
| Baseline testing                                      | 7,853 (73%)                                     | 3,277 (30%)                                  |
| + Follow-up test ≤2 weeks*                            | 2,229 (21%)                                     | 951 (9%)                                     |
| + Follow-up test ≤3 weeks†                            | 3,085 (29%)                                     | 1,340 (12%)                                  |
| <b>Myocardial infarction patients (n=16,357)</b>      |                                                 |                                              |
| Baseline testing                                      | 9,273 (57%)                                     | 3,766 (23%)                                  |
| + Follow-up test ≤2 weeks*                            | 1,816 (11%)                                     | 726 (4%)                                     |
| + Follow-up test ≤3 weeks†                            | 2,645 (16%)                                     | 1,078 (7%)                                   |
| <b>Hypertension patients (n=162,437)</b>              |                                                 |                                              |
| Baseline testing                                      | 125,219 (77%)                                   | 54,174 (33%)                                 |
| + Follow-up test ≤2 weeks*                            | 35,502 (22%)                                    | 14,559 (9%)                                  |
| + Follow-up test ≤3 weeks†                            | 54,585 (34%)                                    | 22,710 (14%)                                 |
| <b>CKD patients (n=31,399)</b>                        |                                                 |                                              |
| Baseline testing                                      | 27,961 (89%)                                    | 13,913 (44%)                                 |
| + Follow-up test ≤2 weeks*                            | 8,457 (27%)                                     | 4,198 (13%)                                  |
| + Follow-up test ≤3 weeks†                            | 12,482 (40%)                                    | 6,324 (20%)                                  |
| <b>PAD patients (n=5,131)</b>                         |                                                 |                                              |
| Baseline testing                                      | 4,137 (81%)                                     | 1,671 (33%)                                  |
| + Follow-up test ≤2 weeks*                            | 1,198 (23%)                                     | 458 (9%)                                     |
| + Follow-up test ≤3 weeks†                            | 1,751 (34%)                                     | 698 (14%)                                    |
| <b>Diabetes patients (n=38,525)</b>                   |                                                 |                                              |
| Baseline testing                                      | 35,134 (91%)                                    | 15,907 (41%)                                 |
| + Follow-up test ≤2 weeks*                            | 9,161 (24%)                                     | 3,794 (10%)                                  |
| + Follow-up test ≤3 weeks†                            | 14,093 (37%)                                    | 5,994 (16%)                                  |

Abbreviations: CKD, chronic kidney disease

\*Follow-up test among those with baseline measurements

† Sensitivity analysis illustrating the importance of 2 vs. 3-week cut-off interval in follow-up test intervals.

**eTable 4:** Prevalence of baseline and follow-up serum creatinine monitoring among patients initiating renin-angiotensin system blockade according to clinical guideline recommendations, stratified by year of ACEI/ARB initiation, 2004-2014

|                               | All initiators<br>n=223,814              |                                          | 2004/2005<br>n=51,529                    |                                          | 2006/2007<br>n=59,881                    |                                          | 2008/2009<br>n=47,472                    |                                          | 2010/2011<br>n=37,183                    |                                          | 2012/2014<br>n=27,749                    |                                          |
|-------------------------------|------------------------------------------|------------------------------------------|------------------------------------------|------------------------------------------|------------------------------------------|------------------------------------------|------------------------------------------|------------------------------------------|------------------------------------------|------------------------------------------|------------------------------------------|------------------------------------------|
|                               | Wide baseline<br>interval<br>(≤12 month) | Ideal baseline<br>interval<br>(≤1 month) |
| <b>Baseline testing</b>       | 169,218 (76%)                            | 75,476 (34%)                             | 36,649 (71%)                             | 14,710 (29%)                             | 45,801 (76%)                             | 21,079 (35%)                             | 36,585 (77%)                             | 17,265 (36%)                             | 28,740 (77%)                             | 13,045 (35%)                             | 21,443 (77%)                             | 9,377 (34%)                              |
| + Follow-up test<br>≤2 weeks* | 46,486 (21%)                             | 19,679 (9%)                              | 8,139 (16%)                              | 2,929 (6%)                               | 12,587 (21%)                             | 5,509 (9%)                               | 10,595 (22%)                             | 4,769 (10%)                              | 8,609 (23%)                              | 3,720 (10%)                              | 6,556 (24%)                              | 2,752 (10%)                              |
| + Follow-up test<br>≤3 weeks† | 70,792 (32%)                             | 30,451 (14%)                             | 12,222 (24%)                             | 4,550 (9%)                               | 19,102 (32%)                             | 8,504 (14%)                              | 16,229 (34%)                             | 7,392 (16%)                              | 13,185 (35%)                             | 5,768 (16%)                              | 10,054 (36%)                             | 4,237 (15%)                              |

\*Follow-up test among those with baseline measurements

† Sensitivity analysis illustrating the importance of 2 vs. 3-week cut-off interval in follow-up test intervals.

**eTable 5.** Proportion of new users of ACEI/ARB who continue or discontinue treatment according to guideline recommended cut-off levels of serum creatinine and potassium at follow-up testing

|                                           | Wide monitoring interval<br>(12 month before to the first monitoring within 2 month after) |                  |               | Narrow monitoring interval<br>(1 month before to the first monitoring within 2 month after) |                  |              |
|-------------------------------------------|--------------------------------------------------------------------------------------------|------------------|---------------|---------------------------------------------------------------------------------------------|------------------|--------------|
|                                           | Continuation*                                                                              | Discontinuation* | Total         | Continuation*                                                                               | Discontinuation* | Total        |
| <b>+ 30 day window</b>                    |                                                                                            |                  |               |                                                                                             |                  |              |
| Total number, %                           | 113,210 (92.5)                                                                             | 9,170 (7.5)      | 122,380 (100) | 48,772 (93.0)                                                                               | 3,676 (7.0)      | 52,448 (100) |
| S-creatinine increase $\geq 30\%$ , n (%) | 1,679 (80.7)                                                                               | 401 (19.3)       | 2,080 (100)   | 541 (81.5)                                                                                  | 123 (18.5)       | 664 (100)    |
| S-potassium $>6$ mmol/L, n (%)            | 472 (81.9)                                                                                 | 104 (18.1)       | 576 (100)     | 204 (80.6)                                                                                  | 49 (19.4)        | 253 (100)    |
| <b>+ 90 day window</b>                    |                                                                                            |                  |               |                                                                                             |                  |              |
| Total number, %                           | 86,620 (81.8)                                                                              | 19,239 (18.2)    | 105,859 (100) | 37,920 (82.2)                                                                               | 8,200 (17.8)     | 46,120 (100) |
| S-creatinine increase $\geq 30\%$ , n (%) | 1,111 (64.7)                                                                               | 605 (35.3)       | 1,716 (100)   | 372 (65.6)                                                                                  | 195 (34.4)       | 567 (100)    |
| S-potassium $>6$ mmol/L, n (%)            | 261 (61.0)                                                                                 | 167 (39.0)       | 428 (100)     | 110 (57.6)                                                                                  | 81 (42.4)        | 191 (100)    |

Calculated from the measurements closest to the first prescription date in the corresponding intervals, i.e., the most recent baseline measurements and the first follow-up measurement.

\* A patient was considered continuous users when the end date of the first continuous course of therapy was larger than the date of the first follow-up monitoring + 30 days or + 90days (to allow for stock piling and irregular use)

**eTable 6.** Association between patient characteristics and serum creatinine increase  $\geq 30\%$  and follow-up monitoring within 2 weeks following initiation of renin-angiotensin system blockade

| Characteristics                            | Adjusted odds ratio (95% confidence intervals) |                                    |                          |                                                        |                                    |                          |
|--------------------------------------------|------------------------------------------------|------------------------------------|--------------------------|--------------------------------------------------------|------------------------------------|--------------------------|
|                                            | Additional adjustment for ethnicity†           |                                    |                          | Excluding patient with hospitalisation within 30 days† |                                    |                          |
|                                            | S-creatinine monitoring within 2 weeks         | S-creatinine increase $\geq 30\%*$ | S-potassium $>6$ mmol/L* | S-creatinine monitoring within 2 weeks                 | S-creatinine increase $\geq 30\%*$ | S-potassium $>6$ mmol/L* |
| <b>Female sex</b>                          | 1.04 (1.01-1.08)                               | 1.91 (1.64-2.23)                   | 1.09 (0.70-1.71)         | 1.06 (1.04-1.09)                                       | 1.66 (1.48-1.86)                   | 0.94 (0.69-1.27)         |
| <b>Age (years)</b>                         |                                                |                                    |                          |                                                        |                                    |                          |
| < 50 years                                 | 1.00 (reference)                               | 1.00 (reference)                   | 1.00 (reference)         | 1.00 (reference)                                       | 1.00 (reference)                   | 1.00 (reference)         |
| 50-59 years                                | 0.97 (0.92-1.02)                               | 0.91 (0.71-1.16)                   | 1.65 (0.77-3.52)         | 0.99 (0.95-1.03)                                       | 0.86 (0.71-1.05)                   | 1.17 (0.70-1.98)         |
| 60-69 years                                | 1.04 (0.99-1.10)                               | 0.86 (0.68-1.10)                   | 1.23 (0.57-2.65)         | 1.07 (1.02-1.11)                                       | 1.05 (0.87-1.26)                   | 0.98 (0.58-1.64)         |
| 70-79 years                                | 1.22 (1.15-1.30)                               | 1.22 (0.96-1.55)                   | 0.83 (0.36-1.95)         | 1.19 (1.14-1.24)                                       | 1.40 (1.16-1.68)                   | 0.72 (0.41-1.27)         |
| 80+ years                                  | 1.15 (1.06-1.24)                               | 1.61 (1.21-2.14)                   | 0.58 (0.21-1.58)         | 1.17 (1.11-1.24)                                       | 2.16 (1.76-2.66)                   | 0.71 (0.38-1.33)         |
| <b>CKD stage</b>                           |                                                |                                    |                          |                                                        |                                    |                          |
| No CKD ( $\geq 60$ )                       | 1.00 (reference)                               | 1.00 (reference)                   | 1.00 (reference)         | 1.00 (reference)                                       | 1.00 (reference)                   | 1.00 (reference)         |
| Stage 3a (45–59)                           | 1.00 (0.94-1.06)                               | 0.51 (0.39-0.66)                   | 1.82 (0.93-3.55)         | 1.00 (0.96-1.04)                                       | 0.58 (0.49-0.70)                   | 2.40 (1.57-3.68)         |
| Stage 3b (30–44)                           | 1.06 (0.95-1.17)                               | 0.99 (0.71-1.39)                   | 5.66 (2.70-11.9)         | 0.98 (0.92-1.06)                                       | 0.92 (0.73-1.17)                   | 5.15 (3.09-8.58)         |
| Stage 4 (15–29)                            | 1.51 (1.17-1.94)                               | 1.65 (0.87-3.12)                   | 15.0 (5.84-38.8)         | 1.42 (1.20-1.70)                                       | 1.86 (1.23-2.81)                   | 12.2 (6.29-23.7)         |
| <b>Comorbidities*</b>                      |                                                |                                    |                          |                                                        |                                    |                          |
| Heart failure                              | 1.10 (0.99-1.21)                               | 3.07 (2.41-3.91)                   | 2.16 (0.96-4.85)         | 1.15 (1.06-1.24)                                       | 2.57 (2.11-3.13)                   | 2.68 (1.59-4.51)         |
| MI                                         | 0.78 (0.72-0.86)                               | 1.76 (1.35-2.30)                   | 1.10 (0.46-2.63)         | 0.89 (0.82-0.97)                                       | 1.59 (1.23-2.06)                   | 1.89 (1.05-3.41)         |
| Hypertension                               | 0.97 (0.90-1.05)                               | 1.51 (1.19-1.92)                   | 1.01 (0.44-2.30)         | 1.04 (0.99-1.11)                                       | 1.40 (1.16-1.68)                   | 0.81 (0.46-1.42)         |
| PAD                                        | 1.09 (0.96-1.23)                               | 1.63 (1.13-2.35)                   | 1.52 (0.54-4.29)         | 1.16 (1.06-1.26)                                       | 1.74 (1.34-2.27)                   | 1.75 (0.92-3.32)         |
| Arrhythmia                                 | 0.96 (0.92-1.01)                               | 0.84 (0.71-0.99)                   | 0.72 (0.44-1.17)         | 0.98 (0.94-1.01)                                       | 0.80 (0.71-0.91)                   | 0.74 (0.53-1.03)         |
| Diabetes mellitus                          | 0.91 (0.87-0.96)                               | 1.15 (0.96-1.37)                   | 0.58 (0.31-1.09)         | 0.93 (0.90-0.96)                                       | 1.06 (0.93-1.22)                   | 0.93 (0.64-1.35)         |
| <b>Baseline K<math>&gt;6</math> mmol/L</b> | 1.05 (0.98-1.13)                               | 0.86 (0.63-1.15)                   | 7.98 (5.06-12.6)         | 1.03 (0.98-1.08)                                       | 1.01 (0.82-1.24)                   | 6.44 (4.69-8.84)         |

**Abbreviations:** CKD, chronic kidney disease; MI, myocardial infarction; PAD, peripheral arterial disease

\* The increase was based on the difference between the most recent baseline measurements within 12 months before and first follow-up measurement within 2 months after drug initiation. All analyses were restricted to those with both baseline and follow-up measurements (n=105,859).

† The main model was adjusted for sex, age, CKD, heart failure, MI, hypertension, PAD, arrhythmia, diabetes, and calendar period of prescription start
